# Supplementary material for: Effects of Point Mutations in Plasmodium falciparum Dihydrofolate Reductase and Dihydropterate Synthase Genes on Clinical Outcomes and In Vitro Susceptibility to Sulfadoxine and Pyrimethamine
Source: PubMed Central journal article supplement (PMC2728505; doi:10.1371/journal.pone.0006762), 2009-08-26
Supplement: pone.0006762.s002.pdf [file pone.0006762.s002.pdf]

# Resistance to Chloroquine (CQ) and Pyrimethamine-Sulfadoxine (PS) for the Treatment of Uncomplicated *P. falciparum* Malaria in the Upper Amazon Basin.

WRAIR Protocol No. 719, HSPD Log No. A-8568: version 1.4 (18 Dec 98)

**Principal Investigator(s):**

Alan J. Magill M.D., LTC, MC, USA  
Head, Parasitology  
Naval Medical Research Center Detachment  
Lima, Peru  
51-1-561-1149 phone  
51-1-561-3042 fax  
magill@namrid.sld.pe

Alejandro Llanos Cuentas M.D  
Head, School of Public Health  
Universidad Peruana Cayetano Heredia  
Lima, Peru  
51-1-382-0310 phone  
51-1-381-9072 fax  
allanos@upch.edu.pe

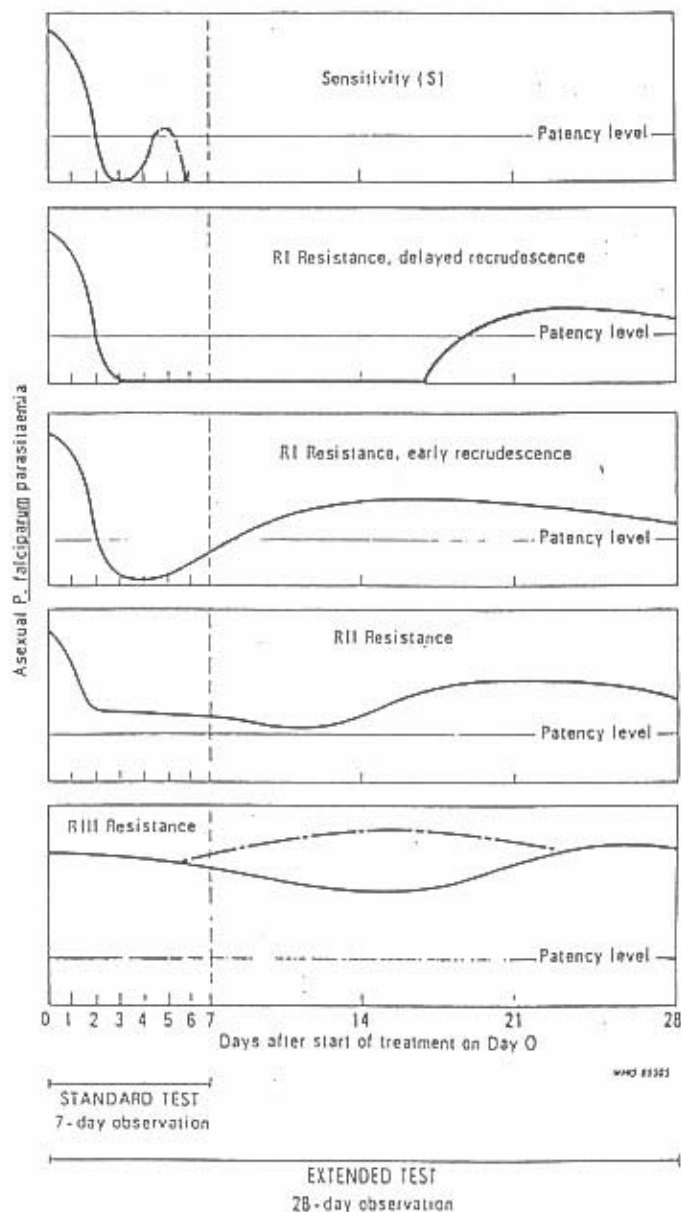

## PROJECT TITLE

Resistance to chloroquine (CQ) and pyrimethamine - sulfadoxine (PS)  
for the treatment of uncomplicated *P. falciparum* malaria in the Upper  
Amazon Basin

Short title: CQ/PS - resistance in the Peruvian Amazon

WRAIR Protocol N° 719 HSPD Log N° A-8568 Version 1.0 (18 Dec 98)

1 **1. PROJECT TITLE:** Resistance to chloroquine (CQ) and pyrimethamine-sulfadoxine (PS) for  
2 the treatment of uncomplicated *P. falciparum* malaria in the Upper Amazon Basin.

3 Short title: CQ/PS-resistance in the Peruvian Amazon

4 WRAIR Protocol No. 719, HSPD Log No. A-8568: version 1.0 (18 Dec 98)

5

6 **2. PERSONNEL:**

7

8 A) Principal Investigator:

9

10 Alan J. Magill M.D.  
11 LTC, MC  
12 Head, Parasitology  
13 Naval Medical Research Detachment (NAMRID); Lima, Peru  
14 011-51-1-561-1149 phone  
15 011-51-1-561-3042 fax  
16 magill@namrid.sld.pe  
17

18 B) Associate Investigators:

19

20 Alejandro Llanos M.D.  
21 Head, School of Public Health  
22 Universidad Peruana Cayetano Heredia (UPCH)  
23 Lima, Peru  
24

25 Lely Solari M.D.  
26 Clinical Research Associate  
27 US NAMRID and Universidad Peruana Cayetano Heredia  
28

29 LCDR Ellen Anderson  
30 Parasitologist  
31 US NAMRID  
32

33 Hugo Rodriguez  
34 Director del Programa de Control de Malaria y OEM  
35 Hospital de Apoyo Yurimaguas  
36 Yurimaguas, Peru  
37

38 To be Named  
39 Coordinator, Regional Malaria y OEM  
40 Direccion Regional de Salud de Loreto  
41 Iquitos, Peru  
42

43

44  
45  
46  
47  
48  
49  
50  
51  
52  
53  
54  
55  
56  
57  
58  
59  
60  
61  
62  
63  
64  
65  
66  
67  
68  
69  
70  
71  
72  
73  
74  
75  
76  
77  
78  
79  
80  
81  
82  
83

C) Collaborators:

MAJ Dennis Kyle  
Chief, Dept. of Parasitology, Division of Experimental Therapeutics  
Walter Reed Army Institute of Research (WRAIR)  
Washington D.C. 20307

D) Approving Officials:

Carlos Calampa M.D.  
Director de Regional de Salud Loreto  
Iquitos, Peru

Doug Watts Ph.D.  
Scientific Director  
U.S. NAMRID

Trueman Sharp M.D.  
Officer-in-Charge  
U.S. NAMRID

E) Medical Monitor:

Dr. Pedro Legua Leiva  
Assisting Physician  
Department of Communicable Diseases and Dermatology  
Hospital Nacional Cayetano Heredia  
Lima, Peru

**3. RESOURCES AND COORDINATION:** Physicians, technicians, and field workers from the US NAMRID, collaborating host country and US based institutions, and from the Ministry of Health (MINSa) of Peru will participate. US NAMRID and MINSa personnel, under the direction of the principal investigator (PI) will perform clinical therapeutic efficacy trials (*in vivo* resistance studies). MINSa personnel will assist in coordinating studies at all field sites. Blood samples collected during the therapeutic efficacy trials will be analyzed at NAMRID or in the laboratories of collaborating institutions.

84 **4. LOCATION OF STUDY:** The decision to test CQ or PS in any particular site will be made  
85 based on consultation with the local malaria control authorities from the Ministry of Health  
86 (MINSA). Current MINSA policy is to use chloroquine (CQ) as first line therapy for all areas in  
87 Peru with sensitive strains. Second line therapy is pyrimethamine / sulfadoxine (PS) in areas  
88 with CQ resistance. Third line therapy is quinine / tetracycline (QT) or quinine / clindamycin  
89 (QC) for areas with both CQ and PS resistance.

90

91 The decision to change from one therapy to another is based on follow-up of treated  
92 patients with control smears taken on days 7 and 14 following start of therapy. A smear positive  
93 slide on days 7 or 14 indicates failure and the patient is classified as a drug failure due to  
94 resistant parasites. This "cohort" system is in use country-wide. When > 20% failures are  
95 documented in an area, this is cause for changing to the next line of therapy.

96

97 For example, if clinicians treating patients at the site report few if any treatment  
98 failures with CQ and a review of MINSA slide registries show a low number of parasitologic  
99 positives on the day 7 and day 14 control smears, one could conclude there is little evidence for  
100 CQ resistance in the area. This may be an ideal location to begin surveillance for emerging CQ  
101 resistance. On the other hand, a site with treatment failures and positive control slides may  
102 want a formal resistance evaluation to determine the real level of resistance in the community.  
103 These same considerations are true for PS. At this time we plan to perform three trials in the  
104 1999 transmission season (Jan-Jul) in an area thought to be CQ and PS sensitive, an area  
105 thought to be CQ resistant and PS sensitive, and an area thought to be both CQ and PS resistant,  
106 but in which all parties want a formal assessment to determine the real scope of the problem.  
107 The decision to use any particular site must also consider the desire for the local MINSA to  
108 collaborate, the logistics of the site, and any relevant security considerations.

109

110 The choice between quinine (Q), quinine/tetracycline (QT), and quinine/clindamycin  
111 (QC) as an alternative treatment for those failing CQ or PS treatment will largely reflect the  
112 local standard of care in the community and the current MINSA guidelines. For most areas of  
113 Peru this means use of QT and QC for those in whom QT is contraindicated. Patients receiving  
114 alternative therapy will be monitored by study investigators in conjunction with MINSA health

115 care providers to insure a favorable outcome for the subject.

116

117 The endpoint for monitoring for the subject will be the conclusion of the 14 day or 28  
118 day study period and the satisfactory clinical and parasitological response for all ETFs and LTFs  
119 who require alternative treatment. The endpoint for the location will be documentation of a  
120 greater than 20% failure rate. Continued surveillance may be performed with the next line of  
121 therapy. It is our plan to reevaluate selected drugs at the sites annually, in conjunction with the  
122 GEIS program, contingent on continued support.

123

124 NAMRID laboratories in Iquitos and/or Lima will receive blood samples from the various  
125 study sites and prepare, stain, and interpret blood smears; cryopreserve parasites; perform  
126 polymerase chain reaction (PCR); and perform *in vitro* culture and drug sensitivity assays.  
127 Isolates and filter paper blood dots will be shipped to participating laboratories in the United  
128 States and host country collaborating institutions.

129

130 5. INVESTIGATIONAL NEW DRUG (IND) INFORMATION: Not Applicable

131

132 6. TIME REQUIRED TO COMPLETE: Up to 4 years from the start of the study

133 Projected Start: January 1999; Projected Completion: January 2003.

134

135 7. INTRODUCTION:

136

137 **A. Synopsis:** *Plasmodium falciparum* malaria (Pf) has become a major problem in the  
138 Peruvian Amazon within the last 6 years. For example, only 729 cases of Pf were reported in  
139 the Department of Loreto in 1992, whereas 30,680 cases of Pf were reported during the first  
140 six months of 1997 (MINSAs data on file). Significant numbers of clinical treatment failures to  
141 both CQ and pyrimethamine/sulfadoxine (PS) have been reported, although few rigorous studies  
142 have been performed. CQ is first line drug therapy for acute, uncomplicated Pf where it is still  
143 felt to be effective, and PS is second line therapy. PS is currently first line drug therapy for Pf  
144 in many areas of the Peruvian Amazon because of increasing clinical failures with CQ.

145

146 To assess the extent of CQ or PS resistance among Pf infected patients, prospective  
147 therapeutic efficacy trials will be performed at selected sites in the Peruvian Amazon. These  
148 studies will determine the clinical and parasitological response of Pf patients to standard  
149 therapy with CQ or PS. Symptomatic, febrile patients with smear confirmed Pf mono-infection  
150 will be enrolled. A short questionnaire will be administered to obtain pertinent demographic,  
151 clinical, and epidemiologic data upon enrollment. Blood will be obtained for Pf culture, drug  
152 levels, clinical lab parameters (e.g. CBC, Cr, ALT, etc.), serology, and PCR analysis. The  
153 patients will be evaluated on days 0 (pretreatment), 1, 2, 3, 4, 7, 14, 21 and 28 to verify  
154 response. When logistically feasible, patients will be followed for 28 days. When logistically  
155 difficult or impossible, the patient will be followed for 14 days. If a patient is found to be  
156 parasitemic at any time point between day 4 and the end of the study (day 14 or 28), additional  
157 blood will be drawn and the patient will then be treated with alternative antimalarial drugs (PS  
158 or quinine) as clinically indicated.

159

160 **B. Military Relevancy:** Malaria is the most important infectious disease threat to both US  
161 and Peruvian military forces in the Amazon. Failure of currently available antimalarial drugs  
162 to prevent clinical malaria (suppressive chemoprophylaxis) or to reliably cure soldiers once  
163 they become ill (therapy) are a major concern of the U.S. military infectious diseases research  
164 program (MIDRP). Research into the mechanisms of drug resistance, the correlation of *in vitro*  
165 markers to *in vivo* results, and the field evaluation of rapid methods for determining resistance  
166 are therefore relevant.

167

168 **C. Objectives:**

169

170 Primary:

171

172 1) Determine the level of CQ and / or PS resistance to *P. falciparum* in selected areas of the  
173 Upper Amazon by performing standard therapeutic efficacy studies.

174

175

176

177 Secondary:

178

179 1) Correlate the clinical response to standard therapy with mutations in the binding site for  
180 DHFR/DHPS inhibitors using mutation specific PCR.

181

182 2) Determine the DHFR/DHPS genotype of *P. falciparum* isolates in areas with little or no  
183 prior use of PS and areas with extensive use of PS.

184

185 3) Assess the relationship between specific sequences within the CQ resistance (CQ-R)  
186 locus of Pf chromosome 7 and *in vivo* resistance to CQ treatment.

187

188 4) Determine utility of selected non-microscopic malaria rapid diagnostic devices (MRDDs)  
189 to detect recurrent parasitemia in the follow-up of patients.

190

191 **D. Status:** The widespread use of CQ during the 1950s as part of the global malaria eradication  
192 program led to the near simultaneous appearance of chloroquine resistant *P. falciparum* (CRPF)  
193 malaria in Southeast Asia and South America in the early 1960s. CRPF has spread throughout  
194 much of the endemic areas of the world since then.(Payne 1987) PS was introduced in the early  
195 1980s for the treatment of uncomplicated malaria in Southeast Asia and in the Amazon Basin.  
196 Resistance to pyrimethamine occurred quickly and resistant cases were documented in 1986 in  
197 Thailand. Drug resistance is defined as clinical failures, both therapeutic and prophylaxis, in a  
198 population taking a standard regimen. The basis of resistance in malaria is felt to be the  
199 selection (by drug pressure) of naturally occurring resistant parasites from among a  
200 population of "wild type" isolates as opposed to true acquired resistance of single isolates under  
201 continuous drug pressure. Assessment of CRPF is complicated by differences in the immune  
202 status of the host. For example, a failure of prophylaxis in a non-immune traveler, often the  
203 first sign of emerging resistance to a particular drug, is different from the failure of a drug  
204 regimen to cure a case of acute malaria in a semi-immune individual.

205

206 Traditionally, resistance has been defined by *in vivo* and *in vitro* methods. *In vivo* tests  
207 are also referred to as therapeutic efficacy trials. The first standardized methodology for the



208 assessment of *in vivo* response to drug therapy in Pf was developed shortly after the first  
209 reports of chloroquine resistance in this species.(1965; 1967) The test procedure has  
210 remained essentially unchanged since 1972.(1973) These therapeutic efficacy trials follow set  
211 criteria for the selection of patients, the administration of a standard treatment regimen of the  
212 appropriate drug, and examination of blood smears to determine a parasitological endpoint for  
213 the stipulated period, e.g. 7 days (standard WHO test) or 28 days (extended WHO test). The  
214 standardized tests were originally developed for CQ but they are also used for the evaluation of  
215 the response to other blood schizonticidal drugs (e.g. PS). While the value of these tests in the  
216 context of clinical trials is undisputed, their performance in the field met with constraints due  
217 to the need for daily blood examination, especially when follow-up needed to be extended beyond  
218 7 days. In addition, these tests were primarily conceived for the assessment of the  
219 parasitological response of Pf in non-immune persons and took practically no note of the  
220 clinical response to the drugs.

221

222 This protocol incorporates the basic study plan of the current PAHO protocol  
223 "Assessment of Therapeutic Efficacy of Antimalarial Drugs for Uncomplicated Malaria in the  
224 Americas (OPS/HCP/HCT/113/98) which is based on that originally developed for the testing  
225 of the therapeutic efficacy of antimalarial drugs against clinically manifest infections with  
226 *Plasmodium falciparum* in infants and young children in areas of intense transmission (WHO  
227 document WHO/MAL/96.1077). In the development of this protocol, due note has been taken of  
228 earlier work towards the same objective, as reflected in WHO document WHO/MAL/94.1070,  
229 *Antimalarial Drug Policies*.

230

231 The original protocol and source of the current protocol is the WHO document  
232 WHO/MAL/96.1077. It was reviewed and endorsed in August 1996, at the intercountry  
233 workshop on "Malaria treatment and resistance in Kenya, Zambia and Malawi" (Mangochi,  
234 Malawi) when the inclusion of different follow-up periods, i.e. 7 days, 14 days or 28 days was  
235 recommended, with indication of their role and applications. This protocol was presented and  
236 reviewed at the "Interregional meeting on malaria control with emphasis on drug resistance",  
237 Manila, Philippines, October 1996, during which several modifications were suggested for its  
238 adaptation to areas with low or moderate transmission. The WHO protocol "Assessment of

239 Therapeutic Efficacy of Antimalarial Drugs for Uncomplicated Falciparum Malaria", draft  
240 28.2.97 is based on these recommendations and represents a standard method for monitoring the  
241 therapeutic efficacy of antimalarial drugs for the treatment of patients suffering from  
242 uncomplicated malaria in areas of low or moderate transmission. Finally, PAHO protocol  
243 OPS/HCP/HCT/113/98 incorporates revisions and adaptations to conditions in the Americas  
244 from a meeting of regional experts held in Manaus, Brazil, in March, 1998.

245

246 The PAHO protocol OPS/HCP/HCT/113/98 takes into account clinical and parasitological  
247 response, the need for an efficient technique that provides accurate, reliable and representative  
248 results which lend themselves to inter-area comparison, and applicability under different  
249 epidemiological conditions. In the described form the test is simple and feasible, provides the  
250 essential information, requiring only modest resources in terms of staff and material.

251

252 The purpose of a therapeutic efficacy protocol is to determine the practical efficacy of a  
253 particular drug regimen, with the ultimate objective of ascertaining its continued usefulness or  
254 the need for replacing it in the routine treatment of uncomplicated falciparum malaria in a  
255 particular area. Performance in sentinel sites on an annual basis is an effective surveillance  
256 system.

257

258 Traditionally, *in vitro* methods of assessing resistance have been either the schizont  
259 maturation test (WHO microtest) adapted from the method of Rieckman(Rieckmann, Campbell et  
260 al. 1978) or a metabolic method utilizing the uptake of tritiated thymidine that is the basis for  
261 current drug sensitivity assays.(Desjardins, Canfield et al. 1979) Both methods have  
262 contributed greatly to the *in vitro* determination of resistance but each have significant  
263 limitations. The WHO microtest is labor intensive and performs poorly with low parasitemias  
264 or with prior antimalarial drug use. Drug sensitivity assays are technically and logistically  
265 difficult requiring Pf isolates adapted through *in vitro* culture and the use of radioisotopes. In  
266 addition, some loss of genetic diversity occurs during culture adaptation. Drug sensitivity  
267 assays are most useful for determining the sensitivity of type isolates to a variety of available  
268 and investigational drugs. Use of mutation specific PCR to identify drug resistant genotypes is a  
269 promising methodology to rapidly screen a relatively large number of isolates.

270 Advances in our understanding of the molecular basis of *in vitro* Pf resistance to CQ are  
271 leading to the definition of the molecular determinants of CQ-R.(Wellems, Walker-Jonah et al.  
272 1991) Chloroquine resistance in *P. falciparum* cross maps as a Mendelian trait to a 36 kb  
273 segment of chromosome 7. This segment harbors cg2, a gene encoding a unique approximately  
274 330 kDa protein with complex polymorphisms. A specific set of polymorphisms in 20  
275 chloroquine resistant parasites from Asia and Africa, in contrast with numerous differences in  
276 21 sensitive parasites, suggests selection of a cg2 allele originating in Indochina over 40 years  
277 ago. One chloroquine sensitive clone exhibited this allele, suggesting another resistance  
278 component. South American parasites have cg2 polymorphisms consistent with a separate origin  
279 of resistance. CG2 protein is found at the parasite periphery, a site of chloroquine transport,  
280 and in association with hemozoin of the digestive vacuole, where chloroquine inhibits heme  
281 polymerization.(Su, Kirkman et al. 1997)

282

283 The successful development of molecular assays for chloroquine resistance will aid in  
284 designing optimal antimalarial chemotherapy policies in the face of changing patterns of  
285 resistance. While studies in the Malaria Genetics section of the Laboratory of Parasitic Diseases  
286 at NIH have defined a molecular basis for *in vitro* resistance of *P. falciparum* to CQ, the  
287 relationship between putative CQ-R genotypes and *in vivo* CQ resistance can only be  
288 accomplished in clinical field studies. A definitive answer will require prospective studies with  
289 clear documentation of correct CQ use, lack of other antimalarial use, and contemporaneously  
290 collected samples representing CQ-sensitive (CQ-S) and CQ-R infections as well as collection of  
291 samples for correlation with results of *in vitro* drug sensitivity assays. Comparison of the CQ-R  
292 genotype of pretreatment infections with the clinical outcome of those infections will provide  
293 the basis for testing the hypothesis that the putative CQ-R genotypes are determinants of *in vivo*  
294 CQ resistance. Because it is possible that multiple genetic mechanisms may contribute to *in vivo*  
295 chloroquine resistance, samples obtained in this study will also be preserved for future studies  
296 evaluating alternative or additional CQ-R candidate genes. The extent of chloroquine resistance  
297 in most areas of Peru is unknown and the presence of potentially novel CQ-R genotypes may be  
298 present which will facilitate further studies of the genetic basis of CQ resistance.

299

300

301 Pf resistance to PS is associated with point mutations in the active site of the parasite  
302 enzymes dihydrofolate reductase (DHFR) and dihydropterate synthase (DHPS). Pyrimethamine  
303 binds and inhibits DHFR and sulfa drugs act on DHPS. The combination of a single point mutation  
304 in DHFR causing a serine to asparagine change at position 108 has been linked, either alone or  
305 in combination with mutations at positions 51, 59, or 164, to pyrimethamine  
306 resistance.(Cowman, Morry et al. 1988; Peterson, Walliker et al. 1988; Zolg, Plitt et al.  
307 1989; Foote, Galatis et al. 1990; Peterson, Di Santi et al. 1991; Foote and Cowman 1994) Two  
308 new mutations in DHFR, an in-frame 15 bp repeat, termed the Bolivia repeat (BR), and a  
309 single base alteration at DHFR codon 50 have been found from isolates in the Amazon Basin of  
310 South America (C. Plowe - personal communication). Point mutations in DHPS that have been  
311 associated with decreased susceptibility to sulfadoxine include those at positions 436, 437,  
312 581, and 613.

313

314 The relationship between the DHFR/DHPS mutations and *in vivo* resistance to PS  
315 remains incompletely characterized. Because PCR offers many advantages over standard *in vivo*  
316 resistance and *in vitro* drug sensitivity assays, molecular assays offer a potentially useful tool  
317 for surveillance of resistance. These assays are in need of validation as predictors of *in vivo*  
318 resistance. Mutation specific PCR methods have been developed to detect the presence of these  
319 genotypes in parasite DNA extracted from filter paper blood samples, using methods that have  
320 been shown to be feasible in malaria-endemic areas.(Plowe, Djimde et al. 1995; Plowe and  
321 Wellems 1995; Plowe, Djimde et al. 1996)

322

323 PS is currently the first line drug therapy for acute, uncomplicated *P. falciparum*  
324 malaria in many areas of the Peruvian Amazon because of increasing clinical failures with CQ.  
325 PS is the second line therapy in other areas where CQ is still felt to be effective. PS is an  
326 important component of the control program in Peru as it is inexpensive and can be given as a  
327 single treatment dose. Resistance to PS is not well documented in most areas of Peru, but  
328 widespread reports of clinical failures from health posts and clinicians indicate RII/RIII  
329 resistance is likely to be present in many areas of the Department of Loreto. Preliminary  
330 studies performed by personnel of US NAMRID and the MINSA have found 27% RII/RIII failures  
331 with PS in one location near Iquitos.(Leinicke, Lucas et al. 1997) Additionally, it has been

332 shown that a specific DHFR and DHPS genotype is strongly associated with *in vivo* PS resistance  
333 in the Pf epidemic in Peru (J Kublin - personal communication). We plan to determine the  
334 number and type of DHFR / DHPS mutations present in an area where little or no use of PS has  
335 yet occurred and monitor the rapidity of changes that occur when PS is introduced.

336

337 Factors such as immunity and drug bioavailability may impact on the therapeutic  
338 efficacy of CQ and PS independent of parasite resistance. Therefore, in the logistic regression  
339 analysis for risk factors for CQ-R and PS resistance, age, number of previous episodes of  
340 malaria, and area of residence will be analyzed as potential confounders contributing to the *in*  
341 *vivo* response to CQ or PS treatment. Age is chosen as an available marker for clinical immune  
342 status in this epidemiologic setting and area of residence is included to account for the  
343 possibility that levels of exposure are different among people residing in different areas, e.g.  
344 urban vs. rural. Sera will be collected and stored for potential analysis of more specific immune  
345 markers such as antibody responses to malarial antigens as surrogate markers for acquired  
346 immunity. Blood collected on filter paper from critical days will be used to determine drug  
347 levels to assess bioavailability.

348

349 Determination of the therapeutic efficacy of antimalarials and monitoring the efficacy of  
350 antimalarial drugs over time, especially in the most vulnerable population groups such as  
351 infants, young children, pregnant women, and nonimmune adults in areas with high endemicity  
352 of malaria, can help guide national antimalarial drug policy. In order to assess the therapeutic  
353 efficacy of routine treatment regimens the test will be carried out only in persons suffering  
354 from clinically manifest, microscopically confirmed Pf malaria. The clinical response of the  
355 patients is the main criterion and the number of parasitological examinations will be restricted  
356 to the minimum required for ensuring the patient's safety.

357

358 If a limited set of mutations can be identified as predictive of *in vivo* CQ or PS  
359 resistance, it will be possible to conduct broad surveillance for drug resistant strains of  
360 malaria. The molecular epidemiology studies resulting from such surveillance will be  
361 especially useful in areas where both CQ and PS are still in use, such as the Upper Amazon.

362

363

364 **8. STUDY PLAN:** Therapeutic efficacy trials performed with this protocol will be based on a  
365 protocol from the current World Health Organization (WHO) and Pan American Health  
366 Organization (PAHO) recommendations (Assessment of Therapeutic Efficacy of Antimalarial  
367 Drugs for uncomplicated falciparum malaria in the Americas, OPS/HCP/HCT/113/98). It is  
368 important that our studies are compatible with this protocol so that we may participate in  
369 programs throughout the region consistent with our mission in the DoD Global Emerging  
370 Infections Surveillance (GEIS) program. Studies consist of recording essential patient  
371 information, a clinical assessment, documenting parasitemia, supervised treatment with CQ or  
372 PS, clinical assessment on Days 0, 1, 2, 3, 4, 7, 14, 21 and 28, and parasitological  
373 examination on at least days 0, 1, 2, 3, 7, 14, and 28. (see Time and Event schedule, and flow  
374 sheet, Attachment No. 1).

375

376 On presentation to a MINSA medical treatment facility:

377

378 1) The patient (and prospective volunteer) will have a fingerstick performed by the local  
379 MINSA personnel to determine if the patient has a mono-infection with Pf malaria. The smear  
380 will be stained and interpreted on site by a study microscopist. If the patient is smear positive  
381 for Pf malaria he will be interviewed by a study team member in conjunction with local health  
382 care providers of the MINSA. If the patient meets the inclusion and exclusion criteria (see  
383 Inclusion / Exclusion Criteria, attachment No. 2) and agrees to sign a written informed consent  
384 (see Informed Consent, attachment No. 3), he will be offered enrollment into the study and  
385 assigned a study number. Individuals who are not positive by smear or who have Pv infection  
386 will return to the MINSA health care provider for further care as needed.

387

388 2) Day 0 (D0) data will be recorded in a case report form (CRF) (see CRF, attachment 4).

389

390 3) Venipuncture will be performed using standard aseptic technique suitable for "blood  
391 cultures" (See SOP for Venipuncture, attachment No. 5). An experienced phlebotomist will take  
392 the blood sample from an antecubital vein. Approximately 12 ml (2.5 teaspoons) of whole  
393 venous blood will be obtained from each volunteer. The blood will be collected into 3

394 Vacutainer® collection tubes using the Vacutainer® system or a needle and syringe. One 5 ml  
395 tube with acid-citrate-dextrose (ACD) anticoagulant ("yellow top") will be used to  
396 cryopreserve the Pf isolate, one 5 ml tube with no anticoagulant ("red top") will be used to  
397 collect serum for determination of antibody titers to malarial antigens and clinical parameters  
398 such as liver enzymes, and one 2.5 ml tube with ethylene diaminoacetic acid (EDTA)  
399 anticoagulant to determine a complete blood count.

400

401 4) Venous blood will also be used to prepare, stain, and interpret a blood film. In addition, non-  
402 microscopic assays will be performed with malaria rapid diagnostic devices (MRDDs). At least  
403 four products are likely to be considered Paraight™ F (Becton Dickinson Microbiology Systems,  
404 Sparks, MD, USA), Parasight F+V (Becton Dickinson Microbiology Systems, Sparks, MD, USA),  
405 Pf. combo (AMRAD-ICT, Sydney, Australia) and Optimal® (Flow, Inc., Portland, OR, USA). See  
406 Performance of Optimal, attachment No. 6 and Performance of Parasight F, attachment No. 7.  
407 Results of the respective MRDD are recorded on Attachments No. 8 and 9, respectively. The  
408 purpose of the dipsticks is to determine if they can be successfully used in the follow-up  
409 evaluations for parasitemia. Parasight F™, Parasight F+V, and Pf combo use Pf histidine rich  
410 protein (HRP-II) as the target antigen. Optimal® uses pLDH as the target antigen. We and  
411 others have found HRP-II based tests remain positive for several days after the smear is negative  
412 (antigen positive, parasite negative). This attribute would not make these tests useful for the  
413 goal of detecting recrudescing parasites. On the other hand, pLDH is thought to correlate much  
414 more closely with parasitemia so these MRDDs may be useful in the detection of recrudescing  
415 parasites. At each encounter, fingerprick blood will be used to perform the MRDD assays on  
416 site, in real time. The investigator will record the results on the appropriate DRF and these  
417 results will be compared to the final micro readings at a later time. MRDD results will not be  
418 used to guide or determine treatment. Parasight F™ is available and licensed for use in Peru. To  
419 my knowledge, the other MRDDs are not. The PI has access to these MRDDs through other  
420 collaborative trials.

421

422 5) Patients will then be treated with a standard course of 25 mg (base) / kg of CQ over 3 days,  
423 10 mg / kg on day 1 (D1), 10 mg / kg on D2, and 5 mg / kg on D3. All treatment doses will be  
424 given under supervision of a study investigator (directly observed therapy or DOT), and the

425 patient will be observed for at least 30 minutes post administration to ascertain retention of the  
426 drug. If the patient vomits within the first 30 minutes post administration, the treatment  
427 should be repeated with the same dose. Patients with persistent vomiting will be excluded from  
428 the study and referred to the appropriate health facility. Verification of CQ treatment will be  
429 documented on attachment No. 10. Verification of PS treatment will be documented on  
430 attachment No. 11.

431

432 6) Subjects will return to the clinic on days 1, 2, 3, 4, 7, 14, 21 and 28. Subjects will have a  
433 fingerstick and malaria smear performed on any day in which "danger signs" are present (see  
434 inclusion / exclusion criteria), days 3, 7, 14, and 28 or any other day in which the study  
435 physician feels a smear is clinically indicated.

436

437 7) Subjects will have a clinical evaluation performed on each encounter with the subject.  
438 Results are recorded on attachment No. 12.

439

440 8) Subjects or the parent/guardian will be instructed to bring the child to the clinic on any of  
441 the days 1-28 if he/she develops any of the danger signs, if the volunteer is still sick or if  
442 there is any cause for worry. At any time, if the volunteer shows clear clinical deterioration a  
443 blood film will be taken, in order to differentiate resistant malaria from other causes of  
444 treatment failure (see Overall Classification of Therapeutic Response, below).

445

446 9) Individuals who worsen clinically and require treatment with a different drug will be  
447 removed from the study after a second sample of venous blood is taken. Individuals who still  
448 have parasites in their blood smear on day 7 will be treated with a second line therapy (PS or  
449 quinine plus tetracycline (TCN)) regardless of the clinical status.

450

451 **Classification of Therapeutic Response:**

452

453 **Parasitologic:**

454

455 Parasitologic criteria for recognition of suspected resistance of malaria parasites to



456 antimalarial drug therapy were adopted in 1974. A standard procedure for determining the  
457 level of resistance was subsequently recommended by WHO. These were defined as:

458

459 **RI resistance:** disappearance of parasitemia by thick smear microscopy by day 7 after  
460 drug therapy followed by recurrent parasitemia by day 28;

461

462 **RII resistance:** a  $\geq 75\%$  diminution of parasitemia by day 3 and followed by a subsequent  
463 rise in parasitemia; and,

464

465 **RIII resistance:** a  $< 75\%$  or no diminution of parasitemia by day 2 (48 hours after first  
466 treatment dose) following drug therapy.

467

468 Therapeutic failure is defined as RII or RIII resistance and persistence or worsening of fever  
469 and other symptoms of malaria at day 3. (Note: day of treatment is day 0.)

470

471 **Clinical:**

472

473 There are three categories of therapeutic response recommended in the current PAHO  
474 protocol "Assessment of Therapeutic Efficacy of Antimalarial Drugs for Uncomplicated Malaria  
475 in the Americas (OPS/HCP/HCT/113/98): early treatment failure (ETF), late treatment  
476 failure (LTF) and adequate clinical response (ACR). These definitions were established in  
477 recognition of the difficulties encountered in using the traditional criteria. They are defined as  
478 follows:

479

480 **Early treatment failure (ETF):** if the patient develops one of the following conditions  
481 during the first three days of follow-up:

482

483 1. Development of "danger signs" or severe malaria on Day 1, Day 2, or Day 3 in the  
484 presence of parasitemia;

485 2. Parasitemia on Day 2 higher than Day 0 count;

486 3. Parasitemia on Day 3  $\geq$  25 % of count on Day 0.

487 **Late treatment failure (LTF)** if the patient develops one of the following conditions  
488 during the follow-up period from Day 4 to Day 28, without previously meeting any of  
489 the criteria of early treatment failure:

490

491 1. Development of ~~danger signs~~ or severe malaria after Day 3 in the presence of  
492 parasitemia (same species as on Day 0);

493 2. Unscheduled return of the patient because of clinical deterioration in the presence  
494 of parasitemia

495 3. Presence of parasitemia on any of the scheduled return on Day 7, Day 14, Day 21  
496 or Day 28 (same species as on Day 0).

497 **Adequate clinical response (ACR)** if the patient did not develop any of the criteria  
498 of early or late treatment failure before and parasitological clearance has been  
499 confirmed throughout the follow-up period.

500

501 **Interpretation of Test Results:** The *in vivo* studies assess the proportion of all treatment  
502 failures (ETFs plus LTFs) in the sample of patients included in the study. The statistical  
503 procedure adapted for the interpretation of the results allows to test the hypothesis that the  
504 proportion of treatment failures is above a certain level in the study area.

505 A high proportion of ETFs to the first-line antimalarial drug is a strong indicator of the  
506 need for changing the first line treatment. In practice, in most situations the proportion of ETFs  
507 will not be unacceptably high, and a full investigation with a 14 or 28 day follow-up period is  
508 needed to determine the extent of the problem.

509

510 **A. Subjects:**

511

512 (1) **Number of Subjects:** Sufficient volunteers per study site will be enrolled to  
513 determine the degree of resistance per site according to the statistical tables in Attachment  
514 No. 12. The true rate of resistance in most areas is unknown. We plan on open enrollment

515 until complete data from several sites within the Upper Amazon Basin are obtained within  
516 the limits of personnel and financial resources. Studies may be repeated in the same site on  
517 successive years as part of a surveillance program conducted under the DoD Global Emerging  
518 Epidemiological Surveillance (GEIS). We plan to complete 3 therapeutic efficacy trials in  
519 the 1999 transmission season (Jan-Jul) for an enrollment of about 150-200 people.

520

521 **(2) Age range and sex:** Individuals older than 6 months. No restrictions or recruitment  
522 quotas for gender. Known pregnancy is a contraindication to enrollment.

523

524 **(3) Inclusion criteria:**

525

526 1. Pf mono-infection with asexual forms

527 2. Parasite density of greater than 500 per mcl and less than 200 parasites per oil  
528 immersion field (MINSA quantification of "4 plus")

529 3. Age > 6 months

530 4. Temperature greater than 38C (101F) or history of fever in last 72 hours.

531 5. Available and willing to return for follow-up

532

533 **(4) Exclusion criteria:**

534

535 1. Presence of any of the following "danger" signs or symptoms suggestive of severe  
536 malaria:

537 Not able to drink or breastfeed

538 Repeated vomiting (unable to keep anything down)

539 Convulsions during present illness

540 Lethargic or unconscious state

541 Unable to sit or stand up

542 Respiratory distress

543 Jaundice (observation) or dark urine (by history)

544 Severe anemia (Hemoglobin < 5 g / dl)

545 Hypotension (systolic BP < 80 mm Hg in adults and < 50 mm Hg in children  
546 under the age of 5)

547 2. Presence of another significant illness or chronic disease.

548 3. Pregnancy (by negative urine pregnancy test no earlier than 48 hours from entry)

549 4. History of hypersensitivity to medication used in the test.

550

551 **(5) Source of Volunteers:** Volunteers will come from symptomatic patients who seek  
552 care at MINSA medical treatment facilities. There will be no active recruitment.

553 **(6) Subject identification:** Volunteers entered into the study will be assigned a study  
554 code number. Results will be reported in a descriptive form with no links to identifying  
555 features of individual patients.

556 **(7) Risks and benefits:** Individuals who participate will receive diagnostic  
557 examinations and drug therapy for malaria. Clinical and parasitological failures will be  
558 more readily identified if they are in the study because volunteers will be followed more  
559 closely if they are in the study than they would be if not in the study. Therefore, volunteers  
560 may directly benefit by receiving more timely medical care. There will be no cash payments  
561 made to volunteers who participate in the study, however folate-free vitamins,  
562 toothbrushes, or a small food allotment such as a bag of powdered milk will be given to  
563 volunteers as a modest compensation for their time.

564 There is no unusual risk to those participating in this protocol. There is no unusual risk  
565 to those conducting this research. Fingertick and venipuncture will be performed by  
566 qualified phlebotomists. Standard universal safety precautions will be followed when  
567 handling all blood samples.

568 This is a minimal risk protocol which only involves phlebotomy and no significant  
569 adverse events are expected. Occasional bruising at the site of venipuncture is the most  
570 serious injury that a volunteer can receive by participating in this study. We do not plan to  
571 report this as an unexpected adverse event. Malaria is potentially a severe and fatal illness,

572 particularly in field settings where prompt diagnosis and treatment are not always  
573 available. Therefore, unfavorable clinical outcomes may occur in some study volunteers but  
574 they are not related to participation in this study. If anything, volunteers are expected to  
575 have a decreased risk of severe and complicated malaria if they enroll because they will be  
576 followed closer than they would be otherwise.

577

578 **(8) Special medical care and equipment required:** Medical care for volunteers,  
579 including medications, will be provided by licensed Peruvian physicians who are also study  
580 investigators. All laboratory supplies and required equipment will be provided by US  
581 NAMRID or its collaborators. CQ and PS treatment will be given to patients under the  
582 supervision of a licensed Peruvian physician according to the dosage regimen outlines in the  
583 protocol.

584

## 585 B. Study Design

586

### 587 (1) Tests

588

589 a) Weighing - The patient will be weighed on a reliably calibrated scale and recorded to  
590 the nearest kg.

591

592 b) Measuring body temperatures - Oral temperatures will be measured to one decimal  
593 point and reported as degrees fahrenheit with a digital probe thermometer (Filac®  
594 electronic thermometer) using a new, disposable probe cover for each measurement. The  
595 digital thermometer will be calibrated daily according to the package insert using the  
596 manufacturer's calibration probe. Axillary temperatures will be recorded if the patient  
597 is too young to cooperate with obtaining an oral temperature. If oral or axillary  
598 temperature measurement is less than 36.0°C, the measurement will be repeated.

599

600 c) Microscopic smear examination - Preparation and staining of the blood slides follows  
601 the procedures outlined in the standard operating procedures (SOPs) of the US NAMRID  
602 (see attachment No. 13) using Giemsa staining at pH 7.2. At least three slides will

603 always be made: one with a thick film (for rapid staining, 10-15 min. with 10% Giemsa  
604 stain, and screening while the patient is in attendance), the other two with a thick and  
605 thin film on the same slide for subsequent standard staining (45 minutes with 3%  
606 Giemsa stain). The slides stained with 3% Giemsa are referred to as "study slides 1 and  
607 2" and will be used for the interpretation of the final result. Microscopy results from  
608 the study will be recorded on standard forms (attachment No. 14)

609

610 Parasitemia is quantified based on SOPs (see attachment No. 15). The method  
611 used depends on whether a white blood cell count (WBC) is available . The same  
612 techniques will be employed for establishing parasite counts on each of the subsequent  
613 blood film examinations.

614

615 A blood slide is considered negative for study purposes when the examination of  
616 200 thick film fields by two independent microscopists (A and B) does not show the  
617 presence of asexual forms of *P. falciparum*. The presence of *P. falciparum* gametocytes  
618 should be noted irrespective of asexual forms, but the presence of gametocytes alone is  
619 not sufficient for enrollment in the study.

620

621 d) Hemotological assessment - Hematological assessment will be done by measuring  
622 hemoglobin with the Hemocue® system or the QBC Autoread Hematology System,  
623 following the recommended manufacturers directions.

624

625 e) *In Vitro* culture - Parasites will be cryopreserved according to SOP (see attachment  
626 No 16) and transported to NAMRID Lima laboratory for recovery and in vitro culture  
627 according to standard methods.

628

## 629 (2) Specimens

630

631 a) Amount and schedule of collections: A few drops of capillary whole blood obtained by  
632 fingerprick will be used to make the initial smear evaluation. For those with a positive  
633 result, venipuncture or a second fingerstick will be performed. Each subject will have a

634 D0 venipuncture (15 ml). Those subjects who fail therapy will have a second  
635 venipuncture (day failure = DF). Therefore each subject will have up to 15 to 30 ml  
636 drawn in the course of the study depending on whether or not they fail therapy, their age  
637 and weight, and their hemodynamic status.

638

639 The criterion of a lower age cut-off of 6 months for inclusion in the study is to  
640 conform with the WHO/PAHO standard protocol. However, we have found that very young  
641 children, less than 3 or 4 years of age, do not tolerate even the frequent fingerpricks  
642 (up to 8) required for the study protocol. We will not enroll these patients if both the  
643 children and their parents / guardians are not completely supportive. This will enter a  
644 very minimal selection bias into the study but we feel it is not significant to affect study  
645 endpoints.

646

647 Phlebotomy on children will be performed with concern for maintaining adequate  
648 blood volume (hemodynamic stability) for perfusion and adequate red cell mass for  
649 oxygenation (Hgb per dl). Only children meeting the requirements for hemodynamic  
650 stability will be considered for phlebotomy. The standard is in accordance with the age  
651 adjusted parameters defining "mild" volume depletion (no more than 3-5% body weight  
652 deficit) described in Nelson's Textbook of Pediatrics. Ed. R.E. Behrman, Kliegman R.M.  
653 and Arvin. A. M. W. B. Saunders, Philadelphia. In Fluid Therapy, p. 209, In History and  
654 Physical Examination, p. 1266, In Diseases of the Blood p. 1383 and 1389. (see  
655 attachment No. 19).

656

657 Hemodynamic stability will be documented with a systolic blood pressure defined  
658 above the 5th percentile for age and sex based on accepted standards reported by the  
659 First Task Force On Blood Pressure In Children (Blumenthal, S., et al. Report of the  
660 task force on blood pressure in children, Pediatrics, vol. 59, P. 797). The criteria for  
661 acceptable pulse are based on published standards for resting heart rate in Nelson's  
662 Textbook of Pediatrics. The pulse must be less than the age adjusted, " upper limit of  
663 normal." (See attachment No. 19)

664

665           If the child meets systolic blood pressure and pulse criteria for hemodynamic  
666 stability, adequate red cell volume will then be ensured based on the hemoglobin  
667 measurement. A recognized standard of care for critically ill children recommends a  
668 minimal hematocrit of 30%, which is equivalent to a hemoglobin of about 10 gm per dl.  
669 (Nathan and Oski's Hematology of Infancy and Childhood, 5th Ed. Ed. By David G. Nathan  
670 and Stuary H. Orkin, W.B. Saunders Com. Philadelphia, 1998. In Red Cell Transfusion,  
671 pp. 1786-1787). However, it is well recognized that clinically stable individuals with  
672 chronic anemia tolerate well hematocrits of 20% or less with adequate tissue  
673 oxygenation, and hemoglobin levels of 7 to 8 gm/dl are well accepted thresholds for  
674 adequate tissue oxygenation in hemodiluted surgical procedures. (Messmer K. Acute  
675 preoperative hemodilution; physiological basis and clinical application. In: Tuma RF,  
676 White JV, Messmer K, eds. The role of hemodilution in optimal patient care. Munich: W.  
677 Zuckschwerdt Verlag, 1989: 54-73 and Fontana JL, Welborn L Mongan PD, et al.  
678 Oxygen consumption and cardiovascular function in children during profound  
679 intraoperative normovolemic hemodilution. Anesh. Analg 1995;80:219-25.) By  
680 meeting the criteria for hemodynamic stability described above, the child, by definition,  
681 has a compensated anemia and adequate cardiac output to support oxygen requirements.  
682 Therefore, an intermediate hemoglobin value of 8 gm per dl in the presence of  
683 hemodynamic stability is set as the threshold for phlebotomy. The volume of blood  
684 withdrawn will be limited to 1.0 cc per kg of weight. This represents less than a 2%  
685 reduction in red cell mass even with an assumption of 5% volume deficit.

686

687           These standards will be incorporated into a standard DRF (attachment No. 19)  
688 that will be used on all individuals to determine suitability for phlebotomy. Meeting  
689 minimal criteria for phlebotomy and minimal criteria for study participation are  
690 different. We may enroll a patient into the therapeutic efficacy trial (meets study  
691 inclusion criteria) but not elect to perform phlebotomy on D0.

692

693           Each 15 ml sample will be obtained via a needle and syringe from each patient. For  
694 samples less than 15 ml, the blood will be divided proportionally as below. The venous  
695 blood will be divided as follows:



696

697

698

8.5 ml ACD - 5 ml for cryopreservation for Pf culture, the remainder for DNA preservation in guanidinium HCL

699

700

2.5 ml EDTA - blood smears, filter paper, MRDD dipsticks, QBC or Hemocue, IsoCode Stix (for PCR)

701

702

The remainder into a 7 ml red top - clot at room temp for at one hour, serum separation. Serum used for clinical chemistries allquots saved for antibody work.

703

704

705

706

Results will be available on the same day the slides are made if possible. Slides may be read in the field or at the main laboratory depending on logistical requirements.

707

708

709

b) Evaluations to be made on specimens:

710

711

1. Parasite densities will be calculated by counting the number of asexual parasites per  $\mu$ l of blood. If WBC counts are available then quantification in parasites per  $\mu$ l will be obtained by counting the number of asexual parasites per 200 WBCs and multiplying by WBCs per  $\mu$ l. For initial enrollment purposes, a quantification will always be made using 8000 WBCs per mcl to ensure consistency between sites.

712

713

714

715

716

717

2. On selected sensitive and resistant parasites, drug sensitivity profiles will be obtained to a standard panel of antimalarial drugs.

718

719

720

3. DHFR / DHPS genotypes will be determined via mutation specific PCR

721

722

c) Quality assurance: No specific measures to assure quality assurance are planned due to funding and logistical considerations. Smears are routinely quality controlled in the NAMRID laboratory. PCR assays and in vitro drug sensitivity assays are not licensed or approved tests and are performed in research laboratories.

723

724

725

726

727 d) Specimen storage: Cryopreserved parasites will be stored in vapor phase liquid  
728 nitrogen until ready for *in vitro* cultivation. Blood dots intended for PCR assays will be  
729 kept in a cool, dark place. Each filter paper is stored in a separate plastic bag with  
730 resealable closure and an individual desiccant packet. Each specimen (slide, filter paper,  
731 etc.) will be labeled with the study code number, date of collection, and day of study for  
732 each subject.

733

734 (3) Medications:

735

736 a) No investigational medications will be used in these studies.

737

738 b) Antimalarial medications: The drugs employed for therapeutic efficacy testing will be  
739 of a reliable, quality controlled batch. We plan to purchase drugs from reliable US  
740 sources which manufacture in FDA approved facilities to include CQ phosphate  
741 (Aralen®, Sanofi Pharmaceuticals) and PS (Fansidar®, Roche Laboratories). Drugs  
742 will be stored according to manufacturer's recommendations. The drugs should not be  
743 used beyond the expiry date on the package. For eventual identification at a later stage,  
744 the manufacturer and batch number of the administered drug will be recorded on  
745 attachment No. 10. The following drugs and formulations will be used for the *in vivo*  
746 resistance studies:

747

|     |                            |                     |                          |
|-----|----------------------------|---------------------|--------------------------|
| 748 | <u>1. Chloroquine (CQ)</u> | Tablets 150 mg base | as phosphate or sulphate |
| 749 |                            | Tablets 100 mg base | as phosphate or sulphate |

750

751 Treatment with CQ consists of a three-day course with the following doses:

752

|     |       |                               |
|-----|-------|-------------------------------|
| 753 | Day-0 | 10 mg (base)/ kg body weight  |
| 754 | Day-1 | 10 mg (base) / kg body weight |
| 755 | Day-2 | 5 mg (base) / kg body weight  |

756

757 In case syrup formulations of chloroquine are not available, the bitter taste of

758 chloroquine may render difficult the administration to infants and young children.  
759 This constraint can be overcome by crushing the tablets and mixing them with a  
760 little water and sugar on a spoon. For children with a marked tendency of vomiting  
761 the crushed tablets can be mixed with banana or other locally available foods.

762  
763 2. Pyrimethamine / 25 mg P Tablets + 500 mg S  
764 Sulfadoxine (PS)

765  
766 Treatment with PS is given as a single dose equivalent to 1.25 mg pyrimethamine/kg  
767 body weight (up to a maximum adult dose of 3 tablets = 75 mg of pyrimethamine).  
768 For children the doses appropriate to the various weight groups are shown in  
769 Attachment 17.

770  
771 3. Quinine

772  
773 Treatment with quinine only is with the oral administration of 30 mg salt / kg body  
774 weight per day divided in 3 doses to take every 8 hours. Duration of the treatment  
775 will be for seven days. Dose does not exceed 650 mg per dose (two tablets) or more  
776 than 6 tablets per day (650 mg X 3 = 1,950 mg). Fractioning of the quinine sulfate  
777 tablets for the approximate dose of 30 mg/kg/day is done for children and infants.  
778 Patients will receive information about the adverse effects of quinine, especially  
779 cinchonism (tinnitus, dizziness and hypoacusia).

780  
781 4. Quinine - tetracycline

782  
783 Treatment with quinine plus tetracycline consists of the oral administration of 30  
784 mg/kg quinine divided in 3 doses to take every 8 hours for 7 days. Tetracycline is  
785 administered in the dose of 1000 mg per day divided in 2 doses for 7 days.  
786 Tetracycline cannot be administered to children less than 8 years old or pregnant  
787 women or those who are breast-feeding. Patients will receive information about the  
788 adverse effects of quinine, especially cinchonism (tinnitus, dizziness and  
789 hypoacusia).

790

791

792

793

5. Quinine - clindamycin

794

795

796

797

798

799

800

801

c) Other medications:

802

803

804

805

806

807

808

809

810

811

812

813

814

815

816

817

818

819

820

Treatment with quinine plus clindamycin consists of the oral administration of 30 mg/kg quinine divided in 3 doses to take every 8 hours for 7 days. Clindamycin should be administered in a dose of 20 mg/kg per day divided in 2 doses for 5 days. The patients will receive information about the adverse effects of quinine, especially cinchonism (tinnitus, dizziness and hypoacusia).

1. Paracetamol (acetaminophen) is often used to lower temperature and offer symptomatic relief to patients. The effect of paracetamol on parasite clearance time in *Plasmodium falciparum* malaria has been studied (Brandts, et al. Lancet 350:p.704, 1997). This was a randomized trial comparing quinine plus mechanical antipyresis with or without paracetamol in 50 children with uncomplicated Pf malaria in Gabon. The 25 patients assigned to paracetamol received 50 mg/kg per day in suppository form. Fever clearance time (FCT) was shorter (not statistically significant) in the paracetamol group and parasite clearance time (PCT) was longer in the paracetamol (statistically significant) group. In addition, induced concentrations of TNF and production of oxygen radicals was significantly lower in the paracetamol group. The authors conclude that paracetamol has little additional antipyretic effect over mechanical antipyresis, increases PCT, and may actually be clinically detrimental.

Our study population differs from that reported by Brandts, et al. For example, they used relatively high doses of paracetamol (50 mg / kg per day) given rectally. The doses we would use in Peru are in the range of 30 mg / kg / day. Also, the starting parasitemia in the Gabonese children are significantly higher than that

821 typically found in Peru. In Gabon, the geometric mean was 80,000 parasites per  
822 mcl. Using data from 115 patients with a mono-infection with Pf collected from  
823 another study (WRAIR No. 687) in Iquitos, Peru, we found a geometric mean of  
824 6,071 parasites per mcl, a significantly lower starting parasitemia. Therefore, we  
825 feel that the impact of paracetamol use on our study will be minimal.

826

827 The desirability of reducing fever and the best method to do so in persons with  
828 malaria are controversial. Past experience with patients with malaria and the  
829 parents of children with malaria in Peru have shown that they do expect to receive  
830 something for fever and perceive fever as a major problem. Failure to do so may lead  
831 them to suspect that the investigators are not taking adequate care of them.  
832 Therefore, the option to not use paracetamol for our study subjects in Peru is not  
833 desirable.

834

835 Use of paracetamol may be a confounding variable and its use should be  
836 standardized in our study. We plan to use 3 doses of paracetamol at 10 mg / kg per  
837 dose in each subject on entering. The first dose will be given on entry, the second  
838 dose about 6-8 hours later and the last dose at 12-18 hours after the first.  
839 Parents/guardians may also be instructed to use tepid sponging during the initial 24  
840 to 48 hours. Failure to discuss this issue may lead to perception that treatment is not  
841 effective, and the patient (or parents/guardians) may seek alternative medication  
842 which may interfere with the study protocol.

843

844 2. If during the follow-up, infections other than malaria require the administration  
845 of medications with antimalarial activity, e.g. cotrimoxazole or tetracycline, the  
846 patient will be excluded from the study. Patients given tetracycline as eye ointment  
847 will not be excluded.

848

849 3. Chlorpheniramine, an H1 blocker, is sometimes used for the symptomatic relief  
850 of pruritus associated with CQ use. However, it has also been shown to reverse CQ  
851 resistance in vitro and in vivo. Therefore, chlorpheniramine and other H1 blockers

852 will be specifically prohibited in this CQ efficacy trial.

853

854 d) Alternative treatment of failures:

855

856 1. The indication for alternative treatment at any time between Day 0 and Day 28  
857 should be based on both clinical and parasitological criteria. The goal is to prevent a  
858 worsening of the clinical condition and prevention of death or progression to  
859 complicated malaria. The decision to declare a subject an ETF or LTF and offer  
860 alternative treatment is always somewhat subjective. The clinical evaluation on each  
861 encounter following initial treatment is documented on attachment No. 12. To the  
862 extent possible, the decision to offer alternative treatment will be objective, but the  
863 study physician's first priority is the safety of the subject. Therefore, on occasions,  
864 some subjects may be offered alternative treatment even though they do not meet  
865 criteria listed in attachment No. 12. In those cases, the study physician will list the  
866 reasons why the subject was offered alternative treatment.

867

868 2. Clinical judgement should always be supported by parasitological evidence (see  
869 Classification of Therapeutic Response, above).

870

871 3. The recommended alternative antimalarial treatment will be PS in the case of Cq  
872 failure and quinine plus tetracycline or clindamycin in the case of poor response to  
873 PS. Although the therapeutic efficacy test ends when the patient has been classified  
874 as early treatment failure (ETF) or late treatment failure (LTF) and given  
875 alternative medication, the study team will ascertain that the alternative medication  
876 resolves the clinical illness of the volunteer.

877

878 4. If the patient develops any signs of severe or complicated malaria or any of the  
879 general danger signs during the follow-up period, he will be referred urgently to the  
880 appropriate health facility.

881

882 5. All volunteers with documented parasitemia between Day 7 and Day 28,

883           irrespective of symptoms, will be treated with the alternative antimalarial drug.

884

885       **(4) Follow-up Procedures:**

886

887       a. Rarely, if ever, will all patients enrolled for therapeutic efficacy tests complete the  
888       posttreatment follow-up. The representativeness of the study diminishes with an  
889       increasing number of drop-outs, especially when the reasons of failing posttreatment  
890       follow-up are related to an unsatisfactory outcome of the treatment. Therefore, precise  
891       documentation of the locations of the volunteers at enrollment, and rigorous tracing of  
892       patients who fail to show up on the scheduled days is important to complete data  
893       collection. The number of losses will be limited to < 10 %, the maximum permitted  
894       dropout rate permitted, if at all possible. The reason for dropping out should be  
895       ascertained in every individual case to exclude an association with the outcome of the  
896       test.

897

898       b. A dropout is defined as a patient lost to follow-up despite fulfilling all inclusion  
899       criteria, without developing exclusion criteria during the follow-up period.

900

901       c. The following conditions should not be considered as drop-outs but classified as  
902       exclusions:

903

904           1) Occurrence, during follow-up, of concomitant disease that would interfere with  
905           the clear classification of treatment outcome;

906

907           2) Movement of a patient from the study site to a place outside the reach of active  
908           follow-up (this movement must be unrelated to the response to treatment);

909

910           3) Failure to complete the treatment due to withdrawal of consent;

911

912           4) Antimalarial treatment administered by a third party during the follow-up  
913           period; and,

914

915

5) Detection of *P. vivax* malaria during follow-up.

916

(5) **Disposition of Data:** A copy of the data sheets and the VAAs will be kept on file by the principal investigator, or at NAMRID after the PI leaves, for at least 10 years after completion of the study. We plan no independent QA audit of the data. We do not plan to complete Volunteer Registry forms (60-R).

917

918

919

920

921

(6) **Analysis of Data:**

922

923

a) CRFs will be returned to the PI and data entered into standard data base software programs, by the NAMRID data entry and analysis group. We are currently using the following software:

924

925

926

927

- Data Entry : Fox-Pro for DOS

928

- Management databases : Visual Fox-Pro v.5.0

929

- Analysis : SPSS professional v.7.5 (analysis)

930

Epi-Info v.6.04a

931

Prism

932

EpiCal 2000 v.1.1

933

934

b) **Statistical Considerations:** In trying to estimate the proportion of treatment failures in the overall population from a limited number of patients, bias in the study design is a source of major concern. The results of the study will be biased if its design systematically favors certain outcomes.

935

936

937

938

939

Selection bias is likely to occur, where the study subjects are systematically not representative of the patient population at large. For instance, the presence of the medical team may attract those patients who have already suffered a treatment failure with drugs they received earlier or got from elsewhere. On the other hand, the presence of the investigators and the availability of diagnostic and treatment facilities during the study, may attract to the clinic patients who would not have come for treatment

940

941

942

943

944



945 otherwise, especially in remote or highly endemic areas.

946

947 Under most circumstances, the investigator will be able to detect major bias in the  
948 sample of patients recruited for the study. Close interaction with the local staff in the  
949 clinic will be very fruitful to detect these conditions, and the major concerns in this  
950 respect should be noted in the activity report. The sample of patients enrolled in the  
951 study should be representative of the patients with uncomplicated falciparum malaria  
952 seeking treatment in the health services in that locality.

953

954 In this respect, a study conducted in an outpatient department (OPD) of a district  
955 hospital may provide different results from a study in a Puesto de Salud or in a Centro de  
956 Salud, since patients may refer to the hospital only when the clinical condition is severe  
957 and serious complications occur. Sometimes patients may have already tried different  
958 treatments without success and symptoms were present for a longer period. In some  
959 areas the patients visiting the OPD may be highly representative of the resident  
960 population in the town itself, and results obtained cannot be extrapolated to the  
961 population living in more rural areas.

962

963 To a certain extent, it is possible to reduce bias in the survey and to improve the  
964 representativeness of the results by following some practical rules. Studies should be  
965 carried out in a rural health center very close to a well-defined community, preferably  
966 in two or more health centres at relatively short distance. The study team should avoid  
967 an awareness campaign in the community and the registration book of the clinic can be  
968 used to determine the normal load of patients. Information on drug utilization in the area  
969 should be obtained from the clinic staff. Sample analysis will be performed in a blinded  
970 fashion, such that laboratory personnel do not have access to clinical data while the tests  
971 are being performed.

972

973 c) Sample Size Determination: One of the goals of monitoring the therapeutic efficacy of  
974 antimalarial drugs is to determine if current MINSA national antimalarial drug policies  
975 are still valid, and secondly, to guide the decision to change the recommended treatment

976 of uncomplicated malaria if a systematic study of a sample of patients shows an  
977 unacceptably high proportion of treatment failures. The proportion of clinical failures  
978 which is unacceptable can only be considered from within a national program. This will  
979 vary with the options and the financial, institutional and personnel resources available  
980 to each program.

981

982 1. Sample size can be determined using the Lot Quality Assurance Sampling or LQAS  
983 method (Lemeshow S and Taber S. Lot quality assurance sampling: single and double  
984 sampling plans. World Health Statistics Quarterly. 44:115-132, 1991). This  
985 allows identification of communities in which the prevalence of drug resistance is  
986 above a predetermined critical level, with smaller sample sizes than would be  
987 required using more traditional procedures. Sample sizes may be reduced further  
988 while maintaining statistical precision by using the double sampling procedure of  
989 LQAS.

990

991 2. For calculating the minimal sample size according to this method, the  
992 investigators must first define two threshold levels: a level at which the proportion  
993 of treatment failures is considered acceptable, and a level of treatment failures  
994 which is unacceptable, i.e. above which a change in the first-line drug is indicated.

995

996 3. According to the Double Lot Quality Assurance (DLQAS) method the sample size is  
997 calculated in two stages, according to the example given below. In the first stage, a  
998 relatively small sample is selected and monitored. If the results from the first  
999 sample are "extreme" , i.e. very low or very high levels of treatment failures are  
000 found, then sampling stops and conclusions can be drawn from the smaller sample.  
001 On the other hand, if the results of the preliminary sample are equivocal, then a  
002 second sample is chosen and conclusions should be based on the results of both  
003 combined samples. If the study shows that the critical proportion of treatment  
004 failures is unacceptable according to the threshold defined at the start of the study,  
005 then the decision of changing the first-line treatment can be supported. If the  
006 proportion of treatment failures is below the threshold level considered as

007 acceptable, then the area can be maintained under routine monitoring.

008

009 4. The size of the sample needed depends on the following parameters:

010

011 N = The study population size, presumed to be large;

012  $P_o$  = Upper threshold level of clinical failures beyond which replacement of the  
013 drug under study is considered;

014  $P_a$  = Lower threshold level of clinical failures below which it would be more  
015 acceptable to continue the utilization of present drug;

016  $\alpha$  = Probability of concluding that a community has a low prevalence of clinical  
017 failures when, in fact, it has a high level (type I error);

018  $\beta$  = Probability of concluding that a community has a high prevalence of clinical  
019 failures when, in fact, it has a low level (type II error).

020

021 Example:

022

023 a. A prevalence of 25% treatment failures may be considered as an indication for  
024 the replacement of the first-line drug. Suppose the health authorities are  
025 interested in detecting communities with  $P_o > 0.25$  and want to be 80% sure  
026 (power of the test) that communities with  $P_a \leq 0.10$  will not be wrongly  
027 classified as having high prevalence of drug resistance.

028

029 b. It is assumed that the community has a large value of N, and that  $\alpha = 0.05$ .

030 Locate in the tables of Attachment 18, the table that correspond to  $P_o = 0.25$  and  
031 move down the row that correspond to  $P_a = 0.10$ . At the first stage of the study,  
032 the follow-up of the first 16 (= n1) patients should be evaluated.

033 If the observed number of treatment failures is 0 (= d1) it can be concluded that  
034 the actual proportion of treatment failures in the population of patients  
035 consulting with uncomplicated falciparum malaria is significantly less than 25%  
036 ( $P_o$ );

037

038 c. If the observed number of treatment failures is greater than 5 ( $= d_2$ ), it can  
039 be concluded that the actual proportion of clinical failures in the population is not  
040 significantly less than 25 % ( $P_0$ );

041

042 d. If the observed number of treatment failures in the first stage is  $> 0$  and  $\leq 5$ ,  
043 a second stage of monitoring should be initiated in which more patients are  
044 evaluated until either 6 ( $= d_2 + 1$ ) treatment failures have been observed,  
045 indicating a high failure rate, or until the total number of patients with complete  
046 follow-up has reached 42 ( $= n_1+n_2$ ) presenting no more than 5 ( $= d_2$ )  
047 treatment failures, indicating a low prevalence of drug resistance.

048

049 5. Rarely, if ever, will all patients enrolled for therapeutic efficacy tests complete  
050 the posttreatment follow-up. For this reason, the sample size should be adjusted  
051 multiplying the original sample size by the rate of loss to follow-up and exclusion  
052 from the study. In practice a minimum of about 20% should be added to the minimal  
053 sample size, to allow for drop-outs of patients and for those which will be excluded  
054 from the protocol during the follow-up period.

055 In the example given above the practical approach will be to plan the survey  
056 and to recruit patients until 42 ( $= n_1 + n_2$ ) are enrolled. The conclusions of the test  
057 can already be made if during the follow-up of the first 16 ( $= n_1$ ) patients the  
058 number of treatment failures is 0 ( $= d_1$ ) or is greater than 5 ( $= d_2$ ). Once the  
059 proper clinical management of the remaining patients has been assured, the  
060 resources should be more efficiently used by repeating the survey in a different area.

061

062 d) Presentation of the Results:

063

064 1. All studies will report general information on the study area, a description of the  
065 health facility in which the survey was carried out, the characteristics of the  
066 sample population, including information on drug utilization in the area. The  
067 frequency of the factors recorded on the CRFs will be presented, and possible bias in  
068 the study should be discussed, especially selection bias at the enrollment of the

069 patients

070

071 2. The results should be summarized in a Table indicating the total number of  
072 patients enrolled in the study, the number of patients with adequate clinical  
073 response, the number of patients with early and late treatment failures, the number  
074 of those lost to follow-up, and of those excluded from the study. A detailed account of  
075 the reasons for patients lost to follow-up and those excluded from the study should be  
076 given. The conclusion of the study should clearly report if the proportion of failures  
077 exceeds the "unacceptable upper limit". If the proportion of failures is below the  
078 critical level, the area may need to be maintained under surveillance.

079

080 3. Correlations of the *in vivo* results with *in vitro* results of resistance obtained via  
081 PCR assays or *in vitro* assays will be secondary endpoints of the study. The  
082 prevalence of known mutations in the DHFR and / or DHPS locus correlating to  
083 resistance to PS will also be determined if resources permit.

084

085 (7) Use of Data: Data will be used to verify degree of resistance to CQ or PS in the study  
086 areas and may help in the development of rapid screening assays for CQ resistant parasites.  
087 Novel resistant genotypes may be discovered that would enhance theoretical knowledge for  
088 resistance. This data may also be helpful to the MINSA in planning rational control strategies  
089 for malaria in the Upper Amazon Basin.

090

091 **9. MODIFICATIONS TO / DEVIATIONS FROM THE PROTOCOL:**

092

093 A. Modifications to the protocol will be submitted in writing to the scientific review  
094 committee and human use review committee (HURC) through the Office of Research  
095 Management (ORM) of the WRAIR as appropriate. This protocol will be reviewed initially,  
096 continually, and annually by the WRAIR human use review committee.

097

098 B. Volunteers will be allowed to withdraw from the study at any time without prejudice or  
099 loss of benefits or services to which they are otherwise entitled. Volunteers may be removed

100 from the study by one of the study physicians if at any time their continued participation  
101 could be injurious to their health and well-being. Reasonable deviations from the study  
102 protocol will be allowed to account for unforeseen logistic problems that may occur in the  
103 study sites.

104  
105 **10. USE OF INFORMATION AND PUBLICATIONS ARISING FROM THIS STUDY:** It is  
106 anticipated that the results of this study will be presented to the scientific community via oral  
107 presentations at meetings and written reports and publications in scientific journals.

108  
109 **11. SPECIAL FUNDING IMPLICATIONS:** Funding for this study will be from STO Q,  
110 Antiparasitic Drugs, the Military Infectious Disease Research Program (MIDRP) and Global  
111 Surveillance.

112  
113 **12. COMPENSATION TO VOLUNTEERS FOR BLOOD DONATION:** Volunteers will not be  
114 paid for the donation of whole blood required for participation in this study. All volunteers will  
115 receive a small food allotment of food items (value less than 3 US dollars) and a 30 day supply  
116 of folate free vitamins during the course of study participation.

117  
118 **13. REPORTING OF SERIOUS AND UNEXPECTED ADVERSE EVENTS:** Serious and  
119 unexpected events adverse experiences will be immediately reported by telephone to the  
120 USAMRMC Deputy Chief of Staff for Regulatory Compliance and Quality (302-619-2165)  
121 (non-duty hours call 301-619-2165 and send information by facsimile to 301-619-7803).  
122 A written report will follow the initial telephone call within 3 working days. Address the  
123 written report to the U.S. Army Medical Research and Materiel Command, ATTN: MCMR-RCQ,  
124 504 Scott Street, Fort Detrick, Maryland 21702-5012.

125  
126 **14. SIGNATURE OF PRINCIPAL INVESTIGATOR:** I have read the foregoing protocol and  
127 agree to conduct the study as outlined herein.

128 Alan J. Magill M.D. 18 Dec 98  
129  
130 Alan J. Magill M.D. Date

131 **14. REFERENCES CITED:**

132

133 (1965). Resistance of malaria parasites to drugs. Geneva, World Health Organization.

134

135 (1967). Chemotherapy of Malaria, World Health Organization.

136

137 (1973). Chemotherapy and Resistance to Antimalarials. Geneva, WHO.

138

139 Cowman, A. F., M. J. Morry, et al. (1988). "Amino acid changes linked to pyrimethamine  
140 resistance in the dihydrofolate reductase-thymidylate synthase gene of Plasmodium  
141 falciparum." Proc Natl Acad Sci U S A **85**(23): 9109-13.

142

We describe the isolation and the sequence of the gene for the bifunctional enzyme  
143 dihydrofolate reductase-thymidylate synthase (DHFR-TS; EC 1.5.1.3 and EC 2.1.1.45,  
144 respectively) from two pyrimethamine-resistant clones of Plasmodium falciparum, HB3 and  
145 7G8. We have also derived the sequence of the DHFR portion of the gene, by amplification using  
146 polymerase chain reaction, for the pyrimethamine-sensitive clone 3D7 and the  
147 pyrimethamine-resistant strains V-1, K-1, Csl-2, and Palo-alto. The deduced protein  
148 sequence of the resistant DHFR portion of the enzyme from HB3 contained a single amino acid  
149 difference from the pyrimethamine-sensitive clone 3D7. It is highly likely that this difference  
150 is involved in the mechanism of drug resistance in HB3. The sequence of the DHFR gene from  
151 other pyrimethamine-resistant strains contains the same amino acid difference from the  
152 sensitive clone 3D7. However, they all differ at one other site that may influence  
153 pyrimethamine resistance. The DHFR-TS gene is present as a single copy on chromosome 4 in  
154 all pyrimethamine-sensitive and pyrimethamine-resistant isolates tested. Therefore, the  
155 molecular basis of pyrimethamine resistance in the parasites tested is not amplification of the  
156 DHFR-TS gene.

157

158 Desjardins, R. E., C. J. Canfield, et al. (1979). "Quantitative assessment of antimalarial  
159 activity in vitro by a semiautomated microdilution technique." Antimicrob Agents Chemother  
160 **16**(6): 710-8.

161

A rapid, semiautomated microdilution method was developed for measuring the activity

162 of potential antimalarial drugs against cultured intraerythrocytic asexual forms of the human  
163 malaria parasite *Plasmodium falciparum*. Microtitration plates were used to prepare serial  
164 dilutions of the compounds to be tested. Parasites, obtained from continuous stock cultures,  
165 were subcultured in these plates for 42 h. Inhibition of uptake of a radiolabeled nucleic acid  
166 precursor by the parasites served as the indicator of antimalarial activity. Results of repeated  
167 measurements of activity with chloroquine, quinine, and the investigational new drug  
168 mefloquine demonstrated that the method is sensitive and precise. Several additional  
169 antimalarial drugs and compounds of interest were tested in vitro, and the results were  
170 consistent with available in vivo data. The use of *P. falciparum* isolates with known  
171 susceptibility to antimalarial drugs also permitted evaluation of the cross-resistance potential  
172 of each compound tested. The applications and expectations of this new test system within a drug  
173 development program are discussed.

174

175 Foote, S. J. and A. F. Cowman (1994). "The mode of action and the mechanism of resistance to  
176 antimalarial drugs." Acta Trop 56(2-3): 157-71.

177 The mechanism of action of the antifolate and quinoline antimalarials has been  
178 investigated over the last few decades, and recent advances should aid the development of new  
179 drugs to combat the increasingly refractile parasite. The molecular description of resistance to  
180 the antifolates has been well characterised and is due to structural changes in the target  
181 enzymes, but the factors involved in the parasite's ability to circumvent the action of the  
182 quinoline antimalarials have yet to be fully elucidated. This review discusses the mode of action  
183 of these drugs and the means used by the parasite to defeat our therapeutic ingenuity.

184

185 Foote, S. J., D. Galatis, et al. (1990). "Amino acids in the dihydrofolate reductase-thymidylate  
186 synthase gene of *Plasmodium falciparum* involved in cycloguanil resistance differ from those  
187 involved in pyrimethamine resistance." Proc Natl Acad Sci U S A 87(8): 3014-7.

188 Cycloguanil, the active metabolite of the antimalarial drug proguanil, is an inhibitor of  
189 dihydrofolate reductase as is another antimalarial, pyrimethamine. Its use has been limited by  
190 the rapid development of resistance by parasites around the world. We have determined the  
191 cycloguanil- and pyrimethamine-sensitivity status of 10 isolates of *Plasmodium falciparum*  
192 and have sequenced in all these isolates the dihydrofolate reductase (DHFR; 5,6,7,8-



CQ/PS resistance in the Peruvian Amazon: WRAIR protocol No. 719, version 1.0 (18 Dec 98)

193 tetrahydrofolate: NADP+ oxidoreductase, EC 1.5.1.3) portion of the DHFR-thymidylate synthase  
194 (TS; 5,10-methylenetetrahydrofolate: dUMP C-methyltransferase, EC 2.1.1.45) gene. Instead  
195 of the known serine-to-asparagine change at position 108 that is important in pyrimethamine  
196 resistance, a serine-to-threonine change at the same position is found in cycloguanil-resistant  
197 isolates along with an alanine-to-valine change at position 16. We conclude that pyrimethamine  
198 and cycloguanil resistance most commonly involve alternative mutations at the same site.  
199 However, we also have identified a parasite with a unique set of changes that results in  
200 resistance to both drugs.

201

202 Leinicke, T., C. Lucas, et al. (1997). In vivo resistance to pyrimethamine/sulfadoxine for the  
203 treatment of Plasmodium falciparum in Peru. 46th Annual Meeting of the American Society of  
204 Tropical Medicine and Hygiene, Orlando, FL, USA.

205

206 Payne, D. (1987). "Spread of chloroquine resistance in *Plasmodium falciparum*." Parasitology  
207 Today 3(8): 241-246.

208

209 Peterson, D. S., S. M. Di Santi, et al. (1991). "Prevalence of the dihydrofolate reductase Asn-  
210 108 mutation as the basis for pyrimethamine-resistant falciparum malaria in the Brazilian  
211 Amazon." Am J Trop Med Hyg 45(4): 492-7.

212 Pyrimethamine resistance in cultivated laboratory isolates of *Plasmodium falciparum* is  
213 linked to the dihydrofolate reductase mutation Asn-108, a mutation that acts by interrupting  
214 drug binding within the active site of the enzyme. To determine the prevalence of this mutation  
215 in endemic regions harboring pyrimethamine-resistant malaria, we used a mutation-specific  
216 polymerase chain reaction assay to survey *P. falciparum* strains from a wide section of the  
217 Brazilian Amazon. Mutations were identified directly from blood samples without intervening  
218 steps of in vitro cultivation. Of 42 samples collected from four states in Brazil, 38 (90%)  
219 contained the Asn-108 codon AAC that confers pyrimethamine resistance, four samples  
220 contained only the wild-type Ser-108 codon AGC, and none contained the Thr-108 codon ACC  
221 found in cycloguanil-resistant pyrimethamine-sensitive strains. These findings indicate that a  
222 very high incidence of the Asn-108 DHFR mutation is responsible for pyrimethamine  
223 resistance in the Amazon, and they are consistent with recent failure rates reported for

224 Fansidar (pyrimethamine-sulfadoxine). We suggest that limited use of proguanil be evaluated  
225 as an alternative to pyrimethamine.

226

227 Peterson, D. S., D. Walliker, et al. (1988). "Evidence that a point mutation in dihydrofolate  
228 reductase-thymidylate synthase confers resistance to pyrimethamine in *falciparum* malaria."  
229 Proc Natl Acad Sci U S A 85(23): 9114-8.

230         Analysis of a genetic cross of *Plasmodium falciparum* and of independent parasite isolates  
231 from Southeast Asia, Africa, and South America indicates that resistance to pyrimethamine, an  
232 antifolate used in the treatment of malaria, results from point mutations in the gene encoding  
233 dihydrofolate reductase-thymidylate synthase (EC 1.5.1.3 and EC 2.1.1.45, respectively).  
234 Parasites having a mutation from Thr-108/Ser-108 to Asn-108 in DHFR-TS are resistant to  
235 the drug. The Asn-108 mutation occurs in a region analogous to the C alpha-helix bordering the  
236 active site cavity of bacterial, avian, and mammalian enzymes. Additional point mutations (Asn-  
237 51 to Ile-51 and Cys-59 to Arg-59) are associated with increased pyrimethamine resistance  
238 and also occur at sites expected to border the active site cavity. Analogies with known  
239 inhibitor/enzyme structures from other organisms suggest that the point mutations occur  
240 where pyrimethamine contacts the enzyme and may act by inhibiting binding of the drug.

241

242 Plowe, C. V., A. Djimde, et al. (1995). "Pyrimethamine and proguanil resistance-conferring  
243 mutations in *Plasmodium falciparum* dihydrofolate reductase: polymerase chain reaction  
244 methods for surveillance in Africa." Am J Trop Med Hyg 52(6): 565-8.

245         As chloroquine resistance spreads across Africa, the dihydrofolate reductase (DHFR)  
246 inhibitors pyrimethamine and proguanil are being used as alternative first-line drugs for the  
247 treatment and prevention of *Plasmodium falciparum* malaria. Resistance to these drugs is  
248 conferred by point mutations in parasite DHFR. These point mutations can be detected by  
249 polymerase chain reaction (PCR) assays, but better methods for sample collection, DNA  
250 extraction, and a diagnostic PCR are needed to make these assays useful in malaria-endemic  
251 areas. Here we report methods for collecting fingerstick blood onto filter paper strips that are  
252 air-dried, then stored and transported at room temperature. Cell lysis and DNA extraction are  
253 accomplished by boiling in Chelex-100. We also report a nested PCR technique that has  
254 improved sensitivity and specificity. These procedures readily detect mixed infections of

255 parasites with both sensitive and resistant genotypes (confirmed by direct sequencing) and are  
256 reliable at parasite densities less than 250/mm<sup>3</sup> in field surveys.

257

258 Plowe, C. V., A. Djimde, et al. (1996). "Community pyrimethamine-sulfadoxine use and  
259 prevalence of resistant *Plasmodium falciparum* genotypes in Mali: a model for deterring  
260 resistance." Am J Trop Med Hyg 55(5): 467-71.

261 Pyrimethamine-sulfadoxine (PS, Fansidar; Hoffman-LaRoche, Basel, Switzerland) is  
262 now the first-line antimalarial therapy in parts of Africa with high rates of chloroquine-  
263 resistant *Plasmodium falciparum*. With PS resistance increasing and no suitably inexpensive  
264 and effective third antimalarial drug available, strategies for delaying the spread of PS  
265 resistance in Africa are needed. Community PS usage was measured in two Malian villages, one  
266 rural and one periurban, and prevalence of pyrimethamine-resistant *P. falciparum* genotypes  
267 was determined at these sites and two urban sites. The prevalence of resistant genotypes was  
268 22.6% (n = 84) in the periurban village where PS was available from multiple sources and  
269 large stocks of PS were observed, and 13.5% (n = 89) and 23.4% (n = 77) in a large town and  
270 a city, respectively, where PS is widely available. No pyrimethamine-resistant genotypes (n =  
271 58) were detected in Kollo, a rural village with a community-supported dispensary and clinic  
272 where PS is used sparingly and no PS was available in pharmacies or markets. The high rates of  
273 pyrimethamine resistant genotypes concurrent with higher PS usage argue for a policy of  
274 judicious PS use in Mali and in similar settings. A possible model for slowing the spread of  
275 drug-resistant malaria is illustrated by the example of the Kollo clinic.

276

277 Plowe, C. V. and T. E. Wellems (1995). "Molecular approaches to the spreading problem of drug  
278 resistant malaria." Adv Exp Med Biol 390: 197-209.

279

280 Rieckmann, K. H., G. H. Campbell, et al. (1978). "Drug sensitivity of *plasmodium falciparum*.  
281 An in-vitro microtechnique." Lancet 1(8054): 22-3.

282

283 Su, X., L. A. Kirkman, et al. (1997). "Complex polymorphisms in an approximately kDa  
284 protein are linked to chloroquine-resistant *P. falciparum* in Southeast Asia and Africa." Cell  
285 91(5): 593-603.

286 Chloroquine resistance in a *P. falciparum* cross maps as a Mendelian trait to a 36 kb  
287 segment of chromosome 7. This segment harbors *cg2*, a gene encoding a unique approximately  
288 330 kDa protein with complex polymorphisms. A specific set of polymorphisms in 20  
289 chloroquine-resistant parasites from Asia and Africa, in contrast with numerous differences in  
290 21 sensitive parasites, suggests selection of a *cg2* allele originating in Indochina over 40 years  
291 ago. One chloroquine-sensitive clone exhibited this allele, suggesting another resistance  
292 component. South American parasites have *cg2* polymorphisms consistent with a separate origin  
293 of resistance. CG2 protein is found at the parasite periphery, a site of chloroquine transport,  
294 and in association with hemozoin of the digestive vacuole, where chloroquine inhibits heme  
295 polymerization.

296

297 Wellems, T. E., A. Walker-Jonah, et al. (1991). "Genetic mapping of the chloroquine-  
298 resistance locus on *Plasmodium falciparum* chromosome 7." Proc Natl Acad Sci U S A 88(8):  
299 3382-6.

300 The resurgence of malaria in recent decades has been accompanied by the worldwide  
301 spread of resistance to chloroquine, a drug once uncontested as the first-line antimalarial agent  
302 because of its efficacy and low toxicity. Chloroquine-resistant strains of *Plasmodium*  
303 *falciparum* counter the drug by expelling it rapidly via an unknown mechanism. In the absence  
304 of explicit biochemical knowledge of this efflux mechanism, reverse genetics provides a  
305 powerful approach to the molecular basis of chloroquine resistance. Here we report genetic  
306 linkage analysis in which 85 restriction fragment length polymorphism markers were used to  
307 examine inheritance of the 14 *P. falciparum* chromosomes in a laboratory cross between a  
308 chloroquine-resistant and a chloroquine-sensitive parasite. Inheritance data from 16  
309 independent recombinant progeny show that the rapid efflux, chloroquine-resistant phenotype  
310 is governed by a single locus within an approximately 400-kilobase region of chromosome 7.  
311 Identification and characterization of genes within this region should lead to an understanding of  
312 the chloroquine-resistance mechanism.

313

314 Zolg, J. W., J. R. Plitt, et al. (1989). "Point mutations in the dihydrofolate reductase-  
315 thymidylate synthase gene as the molecular basis for pyrimethamine resistance in *Plasmodium*  
316 *falciparum*." Mol Biochem Parasitol 36(3): 253-62.

317           The dihydrofolate reductase-thymidylate synthase (DHFR-TS) bifunctional complex  
318 from pyrimethamine-sensitive (3D7) and drug-resistant (HB3 and 7G8) clones from  
319 *Plasmodium falciparum* was purified to homogeneity. A modified sequence of purification steps  
320 with a 10-formylfolate affinity column at its center, allows the isolation of the enzyme complex  
321 with a 10-fold higher yield than previously reported, irrespective of the pyrimethamine  
322 resistance of the parasites. Titration of the homogenous DHFR-TS complex with the inhibitor  
323 revealed a 500-fold lower affinity of the enzyme from clone 7G8 for the drug than found with  
324 the enzyme from clone 3D7. Direct comparison of the homogenous enzyme preparations on SDS-  
325 PAGE revealed no difference in the molecular mass of the DHFR-TS from the 3 clones, nor could  
326 a reproducible difference be detected in the peptide patterns obtained after digesting the DHFR-  
327 TS complex with various proteases. The amplification of segments from the DHFR-TS coding  
328 region of the 3 clones and 7 isolates of *P. falciparum* by polymerase chain reaction resulted in  
329 fragments of the predicted length without any size heterogeneity. The DNA sequence of the DHFR  
330 coding region from FCR-3, 3D7, HB3 and 7G8 differs in a total of 4 nucleotides. One point  
331 mutation changes amino acid residue 108 from threonine (FCR-3) or serine (3D7) to  
332 asparagine (HB3 and 7G8). The presence of asparagine-108 appears to be the molecular basis  
333 of pyrimethamine resistance of HB3 and 7G8. The degree of resistance is associated with a point  
334 mutation affecting the codon for amino acid 51 in 7G8.

WRAIR No. 719, Attachment No. 1  
HSPD Log No. A-8568 CQ/PS-R Pf Time and Event  
CQ/PS-R in the Amazon

| Key Time Points of Study (days)                 | D0 | D1  | D2  | D3  | D7  | D14 | D21 | D28 | D symp | DR/ETF/LTF |
|-------------------------------------------------|----|-----|-----|-----|-----|-----|-----|-----|--------|------------|
| Clinic visit                                    | 1  | 2   | 3   | 4   | 6   | 7   | 8   | 9   |        |            |
| Clinical Evaluation                             | X  | X   | X   | X   | X   | X   | X   | X   | X      | X          |
| Measuring oral / axillary temperature           | X  | X   | X   | X   | X   | X   | X   | X   | X      | X          |
| Weighing patient                                | X  |     |     |     |     |     |     |     |        |            |
| Attach No. 2- Inclusion / Exclusion             | X  |     |     |     |     |     |     |     |        |            |
| Attach No. 3 - Informed Consent                 | X  |     |     |     |     |     |     |     |        |            |
| Attach No. 4 - Subject Info form                | X  |     |     |     |     |     |     |     |        |            |
| Attach No. 5 - CQ Rx confirmation               | X  | X   | X   | X   | X   | X   | X   | X   | X      | X          |
| Attach No. 11- PS Rx confirmation               | X  | X   | X   | X   | X   | X   | X   | X   | X      | X          |
| Attach No. 12 - Post Rx f / u                   | X  | X   | X   | X   | X   | X   | X   | X   | X      | X          |
| Parasitological Assessment (thick / thin smear) | X  | X   | X   | X   | X   | X   | X   | X   | X      | X          |
| Attach No. 10 - MRDD performance                | X  | X   | X   | X   | X   | X   | X   | X   | X      | X          |
| Venipuncture                                    | X  |     |     |     |     |     |     |     |        |            |
| Rx #1 CQ - 10 mg base / kg                      | X  |     |     |     |     |     |     |     |        |            |
| Rx #2 CQ - 10 mg base / kg                      |    | X   |     |     |     |     |     |     |        |            |
| Rx #3 CQ - 5 mg base / kg                       |    |     | X   |     |     |     |     |     |        |            |
| Rx PS                                           | X  |     |     |     |     |     |     |     |        |            |
| QBC or Hgb                                      | X  |     |     |     |     |     |     | X   |        |            |
| Blood volume                                    | 15 |     |     |     |     |     |     |     |        | 15         |
| Blood volume (cumulative)                       | 15 |     |     |     |     |     |     |     |        | 30         |
| Alternative Rx                                  |    | X** | X** | X** | X** | X** |     |     | X**    | X          |
| X** = alternative Rx                            |    |     |     |     |     |     |     |     |        |            |

FLOW SHEET FOR TESTING

Initial Evaluation

Symptomatic patients → Fingerprick positive → Interviewed by study personnel for inclusion/exclusion criteria. (attach No. 2) → Counseling about study present to MINSA facility for Pf mono-infection Sign informed consent (attach No. 3)

Study personnel complete → DO venipuncture → DOT (attach No. 10 for CQ)  
Attach No. 4 attach No. 18 DOT (attach No. 11 for PS)

45

Continuing Evaluation

Volunteers return to → DOT (days 2 and 3 for CQ)  
MINSA for scheduled Fingerprick per timeline  
follow-up Clinical evaluation (attach No. 12)  
or symptomatic

Failure Evaluation

Clinical Failure (ETF, LTF) → DF Venipuncture → Insure adequate clinical care / follow-up  
or  
Parasitologic failure (RII, RII)

**Attachment 2: Inclusion / Exclusion Criteria**  
**Study No. 719, HSPD Log No. A-8568**

Date: \_\_\_ / \_\_\_ / \_\_\_  
 D D M M Y Y

**Inclusion Criteria:**

- |                                                                                                                             |     |    |
|-----------------------------------------------------------------------------------------------------------------------------|-----|----|
| 1. Pf mono-infection with asexual forms                                                                                     | YES | NO |
| 2. Parasite density greater than 500 parasites per mcl but less than 200 parasites per oil immersion field (MINSA "4 plus") | YES | NO |
| 3. Age > 6 months                                                                                                           | YES | NO |
| 4. Temperature greater then 38C (101F)                                                                                      | YES | NO |
| 5. History of fever in last 72 hours                                                                                        | YES | NO |
| 6. Available and willing for follow-up                                                                                      | YES | NO |

If the volunteer has any of the above inclusion criteria circled no, he is not eligible for the study. Patient will be referred to clinical point of care for further evaluation.

**Exclusion Criteria:**

1. Does the patient have any of the following signs or symptoms of severe malaria?

- |                                                                                              |     |    |
|----------------------------------------------------------------------------------------------|-----|----|
| Not able to drink or breastfeed                                                              | YES | NO |
| Repeated vomiting (unable to keep anything down)                                             | YES | NO |
| Convulsions during present illness                                                           | YES | NO |
| Lethargic or unconscious state                                                               | YES | NO |
| Unable to sit or stand up                                                                    | YES | NO |
| Respiratory distress                                                                         | YES | NO |
| Jaundice or icterus (observation)                                                            | YES | NO |
| Severe anemia (Hemoglobin < 5.0 g/dl)                                                        | YES | NO |
| Hypotension (systolic BP < 80 mm Hg in adults and < 50 mm Hg in children under the age of 5) | YES | NO |

- |                                                                |     |    |
|----------------------------------------------------------------|-----|----|
| 2. Presence of another significant illness or chronic disease? | YES | NO |
| 3. Pregnancy (negative urine pregnancy test)?                  | YES | NO |
| 4. History of hypersensitivity to medication used in the test? | YES | NO |

If the volunteer has any of the above exclusion criteria circled yes, he is excluded and not eligible for the study. Patient will be referred to clinical point of care for further evaluation.

- |                                               |     |    |
|-----------------------------------------------|-----|----|
| •Is patient willing to sign informed consent? | YES | NO |
| •Is this volunteer eligible for the study?    | YES | NO |

Signature of responsible investigator: \_\_\_\_\_

Printed name of responsible investigator: \_\_\_\_\_



1 **Attachment 3: Drug Resistant Malaria in Peru**  
2 **Volunteer Informed Consent Agreement (English), Page 1 of 2**  
3 **WRAIR Protocol No. 719, HSPD Log No. A-8568 (version 15 Dec 98)**  
4

5 1. You are being asked to volunteer for a research study that will see how well the current  
6 medications for the treatment of malaria are working in Peru. You have falciparum malaria, a  
7 potentially serious and debilitating illness. You have been chosen for this study because you live in  
8 the local area, and are available for follow-up over the next 28 days. You and about 50 volunteer  
9 patients from this area will be included in this study. Your participation in the study will include  
10 taking the medications prescribed, donating a blood sample, and coming back to the health post on at  
11 least eight occasions over 28 days.  
12

13 2. This medical research project is entitled, "Resistance to chloroquine (CQ) and pyrimethamine-  
14 sulfadoxine (PS) for the treatment of uncomplicated *P. falciparum* malaria in the Upper Amazon  
15 Basin. ". The project is being conducted in Peru under the direction of the principal investigator,  
16 Alan J. Magill, M.D., LTC, U.S. Army and Dr. Alejandro Llanos, Director of the School of Public  
17 Health of the Universidad Cayetano Peruana Heredia (UPCH) in Lima, Peru. The study will be  
18 conducted with the collaboration of the regional and local Peruvian Ministry of Health (MINSa).  
19

20 3. The procedure for this study has been explained to you as follows: You will be interviewed by a  
21 study physician, who will ask questions about your past medical history related to malaria and your  
22 current illness. MINSa workers will examine your blood to look for malaria parasites, just the  
23 same as if you were not participating in this study. If you meet the inclusion and exclusion criteria  
24 for the study you will be asked to participate. You will take the medications given to you by the  
25 doctors to treat your malaria.  
26

27 4. Between 10 and 15 milliliters of blood, about two to three teaspoons, will be drawn from a vein  
28 in your arm by a needle when you are included. The blood drawing will be performed by experienced  
29 health care personnel of the US Naval Medical Research Detachment (US NAMRID), Universidad  
30 Peruana Cayetano Heredia (UPCH) or the MINSa who are conducting this study.  
31

32 5. There is no risk to you or your children, if they were chosen for the study, from participating in  
33 this study other than the discomfort of having a needlestick. Your arm will be cleaned with alcohol,  
34 and new sterile needles will be used to minimize the risk of infection. If you have any discomfort,  
35 you will receive medical treatment and be observed until you feel better. You will benefit from  
36 participating in this study because you will be closely followed over the next 28 days. If you  
37 continue to suffer from malaria, you will receive an alternative treatment, quinine plus  
38 clindamycin or quinine plus tetracycline according to MINSa guidelines, which will treat the illness.  
39 There will be someone at the health post every day so that, even on days between scheduled visits and  
40 on weekends you may come in for a checkup if you feel ill. Information about your illness, related to  
41 malaria, obtained during the study will be shared with clinicians caring for me in an effort to  
42 improve the accuracy of diagnosis and efficacy of therapy available to you. Also, you will receive a  
43 small provision of food or snacks, like all other participants. There is no cost to you for  
44 participating in this study.  
45  
46

47 **Attachment 3: Drug Resistant Malaria in Peru**  
48 **Volunteer Informed Consent Agreement (English), Page 2 of 2**  
49 **WRAIR Protocol No. 719, HSPD Log No. A-8568 (version 15 Dec 98)**  
50

51 6. If you have any questions about your participation in this research study, you may contact  
52 the local MINSA representative, study personnel or Dr. Alan J. Magill of the US NAMRID at 01-  
53 561-2733 / 3043. If you have any questions about your rights as a participant in this study, you  
54 may direct them to Dr. Pedro Legua, the medical monitor, at Universidad Peruana Cayetano Heredia  
55 at 01-482-3903 / 3910.  
56

57 7. Your participation in this study is voluntary and if you decide not to participate it will not  
58 prejudice or interfere in your medical care and treatment.  
59

60 8. The MINSA workers or the study investigator's are responsible for the laboratory testing of the  
61 blood sample which will be used to determine my diagnosis, your care and treatment. US NAMRID or  
62 the Walter Reed Institute laboratories or their designees are responsible for the research testing of  
63 my specimen, but their research results will not be used to guide my care.  
64

65 9. Medical inspectors from both the United States and Peru who are checking to be certain that this  
66 research is performed in a safe, legal, and approved manner may be allowed to directly inspect the  
67 forms which include information about you, and information about your test results.  
68 Representatives of the collaborating institutions are eligible to review research records as a part of  
69 their responsibility to protect human subjects in research. You agree to allow such inspection.  
70 However, in all publications, reports and presentations resulting from this research study, my  
71 name will not be used. In addition, a sample of your blood (or serum) can be kept for use in future  
72 studies.  
73

74 10. Although you will not be notified about the results of this study, local MINSA members will  
75 receive a report of the results when the study is completed. The researchers conducting the study  
76 intend to publish its results in medical journals.  
77

78 11. The original copy of this consent form will be retained by the principal investigator. I certify  
79 that I have received a copy of this consent form and understand that signing this form verifies my  
80 willingness to voluntarily participate in the study.  
81

82 •Adult (18 years of age or older): Yes [ ] No [ ]  
83 Volunteer signature: \_\_\_\_\_ Date: \_\_\_\_\_  
84 Volunteer printed name: \_\_\_\_\_

85 Last Name (Paternal) Last Name (Maternal) First Name  
86 Witness signature: \_\_\_\_\_ Date: \_\_\_\_\_  
87

88 •Child or Minor (Less than 18 years): Yes [ ] No [ ]  
89 Parent / Protector signature: \_\_\_\_\_  
90 Parent / Protector printed name: \_\_\_\_\_

91 Last Name (Paternal) Last Name (Maternal) First Name  
92 •Investigator signature: \_\_\_\_\_ Date: \_\_\_\_\_

Date: \_\_\_/\_\_\_/\_\_\_  
D D M M YR

Study No: \_\_\_\_\_

•Baseline Demographics

Nombre: \_\_\_\_\_ Apellido Paterno: \_\_\_\_\_ Apellido Materno: \_\_\_\_\_

Age: \_\_\_\_\_ Sex (circle one): Male Female

Current location: \_\_\_\_\_ (community)

What is the name of your local health post (Puesto de Salud)? \_\_\_\_\_

What is the name of your local Central health post (Centro de Salud)? \_\_\_\_\_

•Baseline Malaria Data

Number of episodes of smear positive malaria in 1998? 0 1 2 3 > 3 \_\_\_\_\_ don't know

Date of last episode of smear positive malaria? \_\_\_\_\_

Species causing last episode? falcip vivax other don't know

Number of illnesses attributed to malaria in 1998? \_\_\_\_\_

Date of last drug therapy for malaria? Date: \_\_\_/\_\_\_/\_\_\_ don't know  
D D M M YR

Treatment received? CQ FQ PS quinine TCN

Other: \_\_\_\_\_ don't know \_\_\_\_\_

•Current Symptoms

Feeling ill for how many days prior to coming to clinic? 1 2 3 4 5 6 7

Symptoms: Headache Low back ache Vomiting Chills Rigors

Currently taking antimalarial drugs? YES NO

If YES, what drugs? chloroquine primaquine PS quinine TCN

Other: \_\_\_\_\_

How long? \_\_\_\_\_ Dose? \_\_\_\_\_

**• Physical Examination**

Temperature: \_\_\_\_\_ C or F      RR rate: \_\_\_\_\_ / min  
 BP: \_\_\_\_\_ systolic / \_\_\_\_\_ diastolic      Pulse: \_\_\_\_\_ / min  
 Spleen size (Hackett score): 0    1    2    3    4    5  
 Comment: \_\_\_\_\_

**•Laboratory:**

|                        |      |          |                             |      |          |
|------------------------|------|----------|-----------------------------|------|----------|
| 1. Smear obtained      | YES  | NO       | 2. Urine Pregnancy test     | POS  | NEG      |
| 3. Optimal             | Done | Not done | 4. Parsight F               | Done | Not done |
| 4. Hemoglobin testing? | YES  | NO       | 6. Other testing performed? | YES  | NO       |

If YES, what tests? \_\_\_\_\_

**• Does the subject have any "danger signs" that require removing patient from the study and consideration of alternative therapy?**

|                                                               |                                               |    |
|---------------------------------------------------------------|-----------------------------------------------|----|
| Persistent vomiting                                           | YES                                           | NO |
| Seizures                                                      | YES                                           | NO |
| Glasgow score of less than 15 for adults<br>or 5 for children | YES                                           | NO |
| If YES, what is score                                         | _____ (scale provided to study investigators) |    |
| Janudice or icterus apparent                                  | YES                                           | NO |
| Severe dehydration                                            |                                               |    |
| "tenting" of skin                                             | YES                                           | NO |
| sunken eyes                                                   | YES                                           | NO |
| Respiratory Difficulty                                        |                                               |    |
| Use of accessory muscles                                      | YES                                           | NO |
| RR > 50 for age < 12 months                                   | YES                                           | NO |
| RR >40 for age 12-59 months                                   | YES                                           | NO |
| RR > 30 for age > 60 months                                   | YES                                           | NO |
| Hypotension                                                   |                                               |    |
| < 80 mm Hg systolic in adults                                 | YES                                           | NO |
| < 50 mm Hg systolic in children                               | YES                                           | NO |

Investigator signature block: \_\_\_\_\_ Date: \_\_\_\_\_

Procedure for aseptic "blood culture" venipuncture:

1. Antecubital space of either right or left arm will be cleaned with a bactericidal wipe.
2. Area above antecubital vein will then be wiped clean with an alcohol pad.
3. Area will then be coated with betadine antiseptic and allowed to set for 2-3 minutes.
4. Vein to be used is then swiped clean with an alcohol pad and allowed to air dry
5. Phlebotamist then inserts a new, disposable 20 or 21 g needle attached to a Vacutainer hub in a vein without touching the vein with gloved hands.
6. Three blood tubes are filled with venous blood: one 7.5 ml ACD blood tube, one 5 ml red top tube, and one 2.5 ml EDTA blood tube.

**OptiMAL<sup>®</sup>**  
**Operating Instructions and Test Interpretation Instructions**

**OPERATING INSTRUCTIONS**

1. Refrigerate buffers and unopened test strips
2. Tests are sensitive to humidity: Allow package to come to room temperature before opening
3. Remove test strip and immediately reclose container tightly. Do NOT return to refrigerator after opening
4. Using disposable 10 mcl pipette from OptiMAL kit, draw up 10 mcl blood from tube of patient's blood or from fingerstick
5. Dispense two (2) drops (30 mcl) Buffer A into test well
6. Add 10 mcl undiluted whole blood to test well, and mix well
7. Place one OptiMAL<sup>®</sup> test strip, thin end down into well, into test well. Allow all of sample to wick completely up the test strip (this takes 8-15 minutes)
8. Dispense four (4) drops of Buffer B into a second, clean, test well
9. If complete wicking of patient's sample onto test strip has not occurred by 15 minutes, proceed to step 10 anyway
10. Transfer the test strip to the second well containing Buffer B, placing thin end down into well. Read test strip after blood color has cleared (approximately 2 minutes), viewing results under direct or indirect sunlight
11. Refrigerate Buffers A and B when not in use

**OptiMAL<sup>®</sup>**  
**Operating Instructions and Test Interpretation Instructions**

**INTERPRETATION INSTRUCTIONS**

1. Positive: Two or three colored bands should appear across the white central area. The top band is a positive control. Bands will be read as positive if present, no matter how faint.
  - a. Three bands indicate *P. falciparum*
  - b. Two bands indicate *P. vivax*, *P. ovale*, or *P. malariae*
2. Negative: Only one colored band at the top of the white central area
3. Invalid: No colored band at the top.

Result should be discarded and test repeated.

4. Illustration of possible test results:

Negative

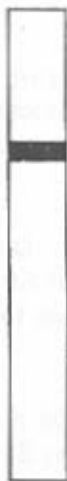

Positive,  
*P. falciparum*

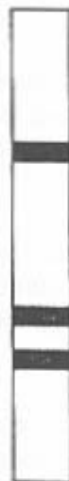

Positive  
*P. vivax*, *P. ovale*  
or *P. malariae*

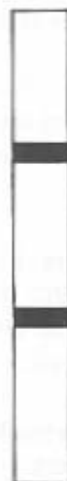

Invalid

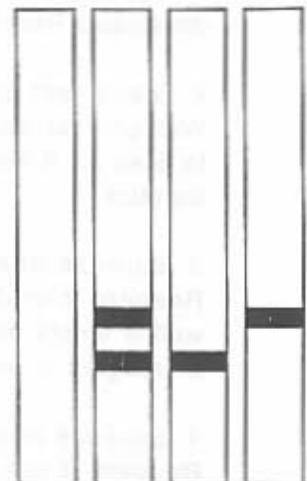

#### SPECIMEN PREPARATION:

Place one 10-well card in Reaction Stand. Discard card after use.

1. Squeeze **three (3)** drops of **Reagent 1** (lysing agent) into a **DispensTube®** device. Stand **DispensTube®** device in Reaction Stand.
2. Fill capillary tube, from end **farthest** from line, directly from a collection tube of well mixed venous blood, or from a finger or heel puncture. Fill tube by capillary action to line.
3. Keep tube nearly horizontal and roll between the fingers several times to mix the blood with the anticoagulant coating.
4. Drain the blood from the capillary tube into the **DispensTube®**. If necessary, use a rubber bulb to force blood from the capillary tube. **Do not mouth pipette.** Insert the empty end of capillary tube into the small opening of the bulb. Holding the large opening of the bulb closed with the index finger, then squeeze the bulb. Discard used capillary tube into biohazard sharps container.
5. Place a **DispensTube®** tip onto the **DispensTube®**. **DO NOT INVERT THE TUBE UNTIL READY TO DISPENSE.**

#### TEST DEVELOPMENT

Remove Test Strip from vial just prior to use. Recap vial after removing Test Strip. Label Test Strip with patient identification label over gray area.

1. Squeeze **one** drop of **whole lysed blood** from the **DispensTube®** into one well in the disposable Reaction Stand. Do not drop blood onto dipstick.
2. Stand Test Strip in the drop of lysed blood with the patient identification facing forward. Wait until all the blood is absorbed into the Test Strip and the well is empty before proceeding to Step 3. If needed, reposition dipstick in well to ensure that all sample is wicked up onto dipstick.
3. Squeeze **one (1)** drop of **Reagent 2** (detection reagent) into the same well. Do not drop **Reagent 2** onto dipstick. Wait until all of Reagent 2 is absorbed into the Test Strip and the well is empty before proceeding to Step 4. If needed, reposition dipstick in well to ensure that all reagent is wicked up onto dipstick.
4. Squeeze **two (2)** drops of **Reagent 3** (wash reagent) into the same well. Do not drop **Reagent 3** onto dipstick. Wait until all of Reagent 3 is absorbed into the Test Strip and the well is empty before reading result. If needed, reposition dipstick in well to ensure that all reagent is wicked up onto dipstick.

**RESULTS:** Read immediately in well-lighted area, viewing under direct or indirect sunlight



**Attachment 8: Optimal MRDD DRF**  
**WRAIR protocol No. 719**

**Patient ID Number:** \_\_\_\_\_

SITE:  
Kit lot No. :

Date: \_\_\_ / \_\_\_ / 98  
DD MM YY

Test performed by (initials): \_\_\_\_\_

Test Interpretation by (initials): \_\_\_\_\_

Photostandards used: YES NO

---

•Control Line present?    0. NO            1. YES  
Intensity:                    0.25   0.5    1    2    3    4  
Comments:

---

•Test Line No. 1 present?    0. NO            1. YES  
Intensity:                    0.25   0.5    1    2    3    4  
Comments:

---

•Test Line No. 2 present?    0. NO            1. YES  
Intensity:                    0.25   0.5    1    2    3    4  
Comments:

---

•Background appearance:    1. white            2. Streaked            3. Dark / stained  
Does colored background affect interpretation of test result:    0. NO            1. YES  
Comment:

---

•Test Result:    NEG    Plasmodium, not Pf    Pf or mixed    Not valid

---

Completed:            Signature/initials: \_\_\_\_\_    Date: \_\_\_\_\_  
Investigator review:    Signature/initials: \_\_\_\_\_    Date: \_\_\_\_\_  
Data entered #1:        Signature/initials: \_\_\_\_\_    Date: \_\_\_\_\_  
Data entered #2:        Signature/initials: \_\_\_\_\_    Date: \_\_\_\_\_

**Attachment 9: Parasight™ F MRDD DRF**

**WRAIR protocol No. 719**

**Patient ID Number:** \_\_\_\_\_

SITE: \_\_\_\_\_

Kit lot No. : \_\_\_\_\_

Date: \_\_\_ / \_\_\_ / 98  
DD M M YY

Test performed by (initials): \_\_\_\_\_

Test Interpretation by (initials): \_\_\_\_\_

Photostandards used: YES NO

•Pf Control Dashes present? 1. YES 2. NO

Intensity: 0.25 0.5 1 2 3 4

Comments: \_\_\_\_\_

•Pv Control Dashes present? 1. YES 2. NO

Intensity: 0.25 0.5 1 2 3 4

Comments: \_\_\_\_\_

•Pf Test Line present? 1. YES 2. NO

Intensity: 0.25 0.5 1 2 3 4

Comments: \_\_\_\_\_

•Pv Test Line present? 1. YES 2. NO

Intensity: 0.25 0.5 1 2 3 4

Comments: \_\_\_\_\_

•Background appearance: 1. White / clean 2. Streaked 3. Dark / stained

Does colored background affect interpretation of test result: 0. NO 1. YES

Comment: \_\_\_\_\_

•Test Result: 1. Negative 2. Positive, P. Falciparum 3. Uninterpretable

Completed: Signature/initials: \_\_\_\_\_ Date: \_\_\_\_\_

Investigator review: Signature/initials: \_\_\_\_\_ Date: \_\_\_\_\_

Data entered #1: Signature/initials: \_\_\_\_\_ Date: \_\_\_\_\_

Data entered #2: Signature/initials: \_\_\_\_\_ Date: \_\_\_\_\_

**Attachment 10: Confirmation of Administration of CQ Therapy**  
**WRAIR Protocol No. 719, CQ/PS resistance In the Amazon**

page 1 of 1

Study Number: \_\_\_\_\_ Weight \_\_\_\_\_ (kg) D0 Date: \_\_ \_\_ / \_\_ \_\_ / 99  
D D M M

Investigator: Solari Other: \_\_\_\_\_

•Dose Calculation: 25 mg (base)/ kg CQ = 25 X \_\_\_\_\_ = \_\_\_\_\_ mg / kg total dose

D0 dose = 10 mg / kg = total dose / 2.5 = \_\_\_\_\_ 2nd investigator initials: \_\_\_\_\_

D1 dose = 10 mg / kg = total dose / 2.5 = \_\_\_\_\_ 2nd investigator initials: \_\_\_\_\_

D2 dose = 5 mg / kg = total dose / 5 = \_\_\_\_\_ 2nd investigator initials: \_\_\_\_\_

•Dose prescribed in 150 mg (base) tablets

D0 dose = \_\_\_\_\_ tablets 2nd investigator initials: \_\_\_\_\_

D1 dose = \_\_\_\_\_ tablets 2nd investigator initials: \_\_\_\_\_

D2 dose = \_\_\_\_\_ tablets 2nd investigator initials: \_\_\_\_\_

•Certification of Tablets Being Provided to Patient

D0: \_\_\_\_\_ tablets given to volunteer D0 Date: \_\_ \_\_ / \_\_ \_\_ / 99

Tablets swallowed YES ND Witness initials: \_\_\_\_\_ Subject initials: \_\_\_\_\_

Vomiting within 30 minutes YES ND Witness initials: \_\_\_\_\_ Subject initials: \_\_\_\_\_

D1: \_\_\_\_\_ tablets given to volunteer D1 Date: \_\_ \_\_ / \_\_ \_\_ / 99

Tablets swallowed YES ND Witness initials: \_\_\_\_\_ Subject initials: \_\_\_\_\_

Vomiting within 30 minutes YES ND Witness initials: \_\_\_\_\_ Subject initials: \_\_\_\_\_

D2: \_\_\_\_\_ tablets given to volunteer D2 Date: \_\_ \_\_ / \_\_ \_\_ / 99

Tablets swallowed YES ND Witness initials: \_\_\_\_\_ Subject initials: \_\_\_\_\_

Vomiting within 30 minutes YES ND Witness initials: \_\_\_\_\_ Subject initials: \_\_\_\_\_

Study Number: \_\_\_\_\_ Weight \_\_\_\_\_ (kg) D0 Date: \_\_\_ / \_\_\_ / 98  
D D M M

Investigator: Solari Other: \_\_\_\_\_

---

•Dose Calculation:

Weight in kg \_\_\_\_\_ X 1.25 mg P = \_\_\_\_\_ mg P required (not to exceed 75 mg)

D0 dose = 1.25 mg / kg = \_\_\_\_\_ 2nd investigator initials: \_\_\_\_\_

---

•Dose prescribed in tablets with 25 mg pyrimethamine (P) plus 500 mg of sulfadoxine (S)

mg P divided by 25 mg per tablet = \_\_\_\_\_ mg P / 25 mg P per tablet = \_\_\_\_\_ tablets  
(to nearest quarter)

D0 dose = \_\_\_\_\_ tablets 2nd investigator initials: \_\_\_\_\_

---

•Certification of Tablets Being Provided to Patient

DO: \_\_\_\_\_ tablets given to volunteer D0 Date: \_\_\_ / \_\_\_ / 99

Tablets swallowed YES NO Witness initials: \_\_\_\_\_ Subject initials: \_\_\_\_\_

Vomiting within 30 minutes YES NO Witness initials: \_\_\_\_\_ Subject initials: \_\_\_\_\_



• Does the subject have any "danger signs" that require removing patient from the study and consideration of alternative therapy?

Circle Response:

|                                                               |                                               |    |
|---------------------------------------------------------------|-----------------------------------------------|----|
| Persistent vomiting                                           | YES                                           | NO |
| Seizures                                                      | YES                                           | NO |
| Glasgow score of less than 15 for adults<br>or 5 for children | YES                                           | NO |
| If YES, what is score                                         | _____ (scale provided to study investigators) |    |
| Jaundice or icterus apparent                                  | YES                                           | NO |
| Severe dehydration                                            |                                               |    |
| "tenting" of skin                                             | YES                                           | NO |
| sunken eyes                                                   | YES                                           | NO |
| Respiratory Difficulty                                        |                                               |    |
| Use of accessory muscles                                      | YES                                           | NO |
| RR > 50 for age < 12 months                                   | YES                                           | NO |
| RR > 40 for age 12-59 months                                  | YES                                           | NO |
| RR > 30 for age > 60 months                                   | YES                                           | NO |
| Hypotension                                                   |                                               |    |
| < 80 mm Hg systolic in adults                                 | YES                                           | NO |
| < 50 mm Hg systolic in children                               | YES                                           | NO |

If any of the above "danger signs" are marked YES, the patient requires urgent evaluation by a study physician and alternative therapy for malaria or another condition as appropriate. The patient will be removed from the study. Final classification of ETF, LTF, or exclusion will depend on outcome of clinical and laboratory evaluation. If all responses above are marked NO then proceed:

•Continued participation of the subject in the study is:      Acceptable      Not-acceptable

If not acceptable, is subject an      ETF      LTF      Dropout      Exclusion

Investigator signature: \_\_\_\_\_

#### A. Blood Smear Slide Preparation

1. Use frosted edge, pre-cleaned glass microscope slides. If pre-cleaned slides are not available, clean slides with 70% ethyl alcohol and let air dry.
2. Make two slides per patient. Label each frosted end of the slide with study information as required per protocol using pencil or pre-printed study labels.
3. Make a thick and a thin blood smear on every slide.
4. Verify that blood is being placed on the correct side of the frosted end slides visually or by feel. Using the pipette, with filter-type tip, place a 10 mcl drop of blood close to the frosted edge of the slide for the **thick** smear and a 4 mcl drop close to thick smear for the **thin** smear.
5. To make the **thin** blood smear, spread the small (4 mcl) drop of blood to the far end of the slide with a second slide. The edge of a clean slide is placed at 30-45 degree angle in front of the drop of blood, pulled back into the drop, and held until the suspension is spread along at least two thirds of the width of the "spreader" slide. It is then pushed forward in a smooth, continuous motion. A properly prepared thin film is thick at the beginning end and thin or "feathered" at the other end. The feathered end of the smear should not reach to the end of the glass slide. The feathered end should have areas optimal for microscopy that are only one cell layer thick. The thin smear is best prepared immediately after applying the drop of blood, before any drying occurs.
6. To make a **thick** blood smear, use the corner of the same slide used to make the thin smear and mix and spread the larger drop (6 mcl) of blood over a circular area about 1 cm (about the size of a dime) in diameter. Continue stirring gently for a few moments and then lift the corner out of the center of the smear, trying not to leave any bubbles in the smear. If bubbles are seen, stir again with the corner of the slide until no bubbles remain, and/or break the bubbles with the sharp corner of the spreading slide.
7. Let the slides dry in a horizontal position. Drying can be aided by letting warm air from a blow dryer pass over the thick smear for 15-20 minutes. A dry smear can easily be recognized by holding to the light and noting any wet areas. Dry slides can be stored vertically in slide boxes. Thick blood smears should dry for at least one hour.
8. After application of blood smear, both during and after drying, slides should be protected from exposure to insects. An acceptable method is placement of slides flat within a flat box or tray with an overlying screen or mesh panel, the panel sufficiently elevated over the slides as not to touch them. Other locally determined methods which prevent insect contact while permitting blood smear drying may be used. The method used should be documented.

## Attachment 13: Malaria Smear SOPs:

### WRAIR Protocol No. 719, CQ/PS resistance in the Amazon page 2 of 6

#### B. Blood Smear Slide Staining

1. Slides must be dried thoroughly. Thick blood smears should dry for at least one hour (can be dried more rapidly, in 10 minutes, using warm air blower, if warranted for clinical urgency).
2. Hold the slide in a slanted position with the **thin film down** and cover the **thin film** with a few drops of absolute methyl alcohol. Be sure **NOT** to get alcohol fumes on the thick films. Alternately, one can dip the thin film **briefly** in a container of methyl alcohol for fixing the thin film, taking great care not to "fix" the thick film with the vapor of the alcohol.
3. Let dry in a vertical position with the **thick film up**. Be sure the slide is thoroughly dry before staining. The introduction of even a minute amount of methyl alcohol into the stain dilution will interfere with the dehemoglobinization of the thick film.
4. Stain in 3% Giemsa for 45 minutes.
5. Rinse the slide briefly by dipping slide in and out of a jar or beaker of buffered water.
6. Let dry in a vertical position.
7. After staining, during drying, slides should be protected from exposure to insects. An acceptable method is placement of slides within a box with an overlying screen or mesh panel, the slides so arranged that the stained smear is not touched by the panel. Other locally determined methods which exclude insect contact while permitting stain drying may be used. The method used should be documented.



**C. Preparation of Giemsa Stain**

**Ingredients:**

Giemsa stain concentrate (EM Sciences, stock number GX0085/5)  
Triton buffered water

**Procedure:**

1. Using a clean, dry pipette, remove 1.5 ml of Giemsa stain concentrate from bottle. No buffer or aqueous solution is introduced into bottle containing the Giemsa concentrate.
2. Add 1.5 ml of Giemsa concentrate to 48.5 ml of Triton-buffered water solution.
3. Filter before use. Store in a brown glass bottle. An empty, dry methyl alcohol bottle is ideal. Never put a wet or used pipette in the stain. Preferably, pour a quantity of stain from the stock bottle into a small bottle for current use.

**D. Preparation of Triton Buffered Water**

1. Alkaline Buffer

Na<sub>2</sub>HPO<sub>4</sub> .....9.5 g  
Distilled water, to make .....1000.0 ml

2. Acid Buffer

NaH<sub>2</sub>PO<sub>4</sub> .....8.0 g  
Distilled water, to make .....1000.0 ml

The acid and alkaline buffers may be kept in separate glass stoppered bottles for long periods.

3. Buffered water

a. Ingredients:

Acid Buffer (NaH<sub>2</sub>PO<sub>4</sub>) .....39 ml  
Alkaline Buffer (Na<sub>2</sub>HPO<sub>4</sub>) .....61 ml  
Distilled water .....900 ml

b. Add buffer solutions to distilled water and mix thoroughly. The pH should be 7.0 to 7.2 for satisfactory stain results. If the pH is above or below this range, it can be adjusted by the addition of the proper buffer.

4. Triton X-100 is moderately viscous and for routine laboratory use, a 10% **aqueous dilution** is prepared. This solution will keep indefinitely if tightly stoppered.

5. Add 1 ml of the stock 10% aqueous dilution of Triton X-100 to 1000 ml buffered water. The concentration of Triton will be 0.01%.

**Attachment 13: Malaria Smear SOPs:**

**WRAIR Protocol No. 719, CQ/PS resistance in the Amazon page 5 of 6**

---

**E. Blood Smear Interpretation**

1. Accurate microscopy is absolutely essential.
  2. In general, at least two slides are prepared from each encounter with the patient. The slides are coded with a study No., site code, subject code number, date, and time. One slide is stained in the field and read as soon as possible, the second is saved to be stained in a more controlled setting.
  3. Each slide will be read by two "certified" NAMRID microscopists. A certified NAMRID microscopist is one in whom a proficiency set of slides has been accurately interpreted. The certified microscopists, Microscopist A and microscopist B, will then record their interpretations on attachment 14.
  4. Examine films using bright field microscopy at 1000x magnification under oil immersion. Microscopy for this study will be performed using Olympus model CH-2 microscopes, using 10x type WHK 10x/20L or WHK 10x/20L-H eyepieces and 100x oil type DPlan 100 1.25 oil 160/0.17 objectives.
  5. Blood smear interpretation will be performed by two blinded experienced microscopists. Microscopist A will read 200 thick film fields of Slide #1 and render a smear interpretation (Positive or Negative for asexual *Plasmodia* forms; gametocytes alone will NOT cause a slide to be classified positive). Results will be recorded on the appropriate DRF. Microscopist B will also read 200 thick film fields of Slide #1 and render a smear interpretation (Positive or Negative for asexual *Plasmodia* forms; gametocytes alone will NOT cause a slide to be classified positive). Results will be recorded on the appropriate DRF.
  6. At each laboratory, Microscopists A and B will each identify parasites by species, and quantify parasites will using thick smears. Parasite density will be calculated by counting the number of asexual parasites (not gametocytes) per 200 WBCs and multiplying by WBCs per mcl. WBC count will be obtained by using the QBC<sup>®</sup> AutoReadPlus or COULTER AC-T10, or manual count as a back up.
  7. In the event of discordant slide interpretations between Microscopists A and B, a third expert microscopist, Microscopist C, will examine both Slide #1 and Slide #2. Microscopist C will provide the final interpretation for the blood smears and will record results on the DRF.
  8. Concordance / Discordance
- Disconcordant blood smear interpretation results are disagreements between Microscopists A and B as to presence of parasitemia, quantitation of asexual parasitemia, or *Plasmodia* species identification.

**Attachment 13: Malaria Smear SOPs:**  
**WRAIR Protocol No. 719, CQ/PS resistance in the Amazon page 6 of 6**

---

Concordance is defined as:

Agreement about presence of asexual forms of *Plasmodia* on smear

-Agreement about species of *Plasmodia* present on smear

-Agreement on level of parasitemia within a factor of 2. For parasitemias of less than 500 per mcl, agreement within a factor of 3 is satisfactory. For parasitemias greater than 50,000 per mcl, an absolute difference of no more than 20,000 parasites per mcl will be tolerated.

Discordance is defined as absence of concordance on any one of the above three points

9. At least 5% of blood smears for which Microscopists A & B have given concordant readings will also be read by Microscopist C for quality control purposes. For this purpose, Microscopist C will examine Slide 1 only. In event of discordance between the quality control reading of Microscopist C and the concordant interpretations of Microscopists A and B, Microscopist A & B's interpretation will be used as the final microscopy reading. Microscopist C will record results on the DRF, and should annotate the comments section on the DRF with "QC".

10. To determine the "final micro" result, we compare concordant A and B readings and report an average of the two quantifications. We expect a small percentage of field read smears will be discordant with the final microscopists A&B reads. The field readings will be performed by a different microscopist than the final "study" reads to ensure blinding.

**Attachment 14: Malaria Smear Interpretation DRF. Microscopist A: slide 1**  
**WRAIR Protocol No. 719, CQ/PS resistance in the Ampicillin 1 of 1 Patient ID No:**

Date sample collected :     /     /     98 Date slide read:     /     /     98 WBCs/mcl:      
 D D M M D D M M

Is slide positive or negative for malaria parasites? Negative (code = 0) Positive (code = 1)

Slide Interpretation (First species): 1. Pf 2. Pv 3. Pm 4. Po 5. Indeterminate

| No. Asexual Parasites Counted | No. Gametocytes Counted | No. WBCs Counted | Asexual Parasites per mcl | Gametocytes per mcl | Morphology Code                                                                           |
|-------------------------------|-------------------------|------------------|---------------------------|---------------------|-------------------------------------------------------------------------------------------|
|                               |                         |                  |                           |                     | 1. Asexual forms only<br>2. Sexual forms only<br>3. Both asexual and sexual forms present |

No. asexual\_par.     X WBCs / mcl     =     Asexual parasites/mcl No. Gametocytes     X WBCs / mcl     =     gametocytes / mcl  
 No. of WBCs     No. of WBCs    

Comments:

Slide Interpretation (Second Species): 1. Pf 2. Pv 3. Pm 4. Po 5. Indeterminate

| No. Asexual Parasites Counted | No. Gametocytes Counted | No. WBCs Counted | Asexual Parasites per mcl | Gametocytes per mcl | Morphology Code                                                                           |
|-------------------------------|-------------------------|------------------|---------------------------|---------------------|-------------------------------------------------------------------------------------------|
|                               |                         |                  |                           |                     | 1. Asexual forms only<br>2. Sexual forms only<br>3. Both asexual and sexual forms present |

No. asexual\_par.     X WBCs / mcl     =     Asexual parasites/mcl No. Gametocytes     X WBCs / mcl     =     gametocytes / mcl  
 No. of WBCs     No. of WBCs    

Comments:

DRF Completed by: Initials:     Date:     Data entry #1: Initials:     Date:      
 Investigator review: Initials:     Date:     Data entry #2: Initials:     Date:    

Final Smear Interpretation: 0 = Neg 1 = positive for one species only 2 = positive for > one species (mixed infection)  
 Final Morphology :

3 = Pf asexual monoinfection 4 = Pf gametocytes only 5 = Pf asexual and sexual forms present 6 = Pv asexual monoinfection  
 7 = Pv gametocytes only 8 = Pv asexual and sexual forms present 9 = mixed Pf / Pv infection 10 = other

Final Verification: Initials:     Date:

**Attachment 15: Method of Counting Parasites in Thick Smears**

**WRAIR Protocol No. 719, CQ/PS resistance in the Amazon** page 1 of 1

1. Asexual parasites will be counted and reported as number of asexual parasites per mcl of whole blood. Gametocytes will be counted and reported separately in the appropriate boxes in data report forms (attachment 14). Counts of parasites, WBCs, and gametocytes will be tallied on manual counters by the microscopists. If the slide shows a mixed infection, then separate counts will be made for each species. All parasites seen in the representative fields should be counted. If the microscopist reaches the 200 WBC count and there are more WBCs in the field of view, those should be counted.

A) If, after 200 white blood cells (WBCs) are counted, 10 or more asexual stage parasites have been identified, record results on the appropriate data report form, indicating the number of parasites per number of WBCs counted.

B) If, after 200 white blood cells (WBCs) are counted, 9 or less asexual stage parasites have been identified, continue counting until 500 WBCs have been counted and record the parasites per 500 WBCs. Record results on the appropriate data report form, indicating the number of asexual parasites per number of WBCs counted.

2. In either case, the parasite count in relation to the WBC count can be converted to parasites per mcl by the mathematical formula:

$$\frac{\text{Number of asexual parasites}}{\text{Number of WBCs}} \times \text{WBC count (WBCs/mcl)} = \text{Number of asexual parasites per mcl}$$

For example, if 506 asexual parasites are counted per 209 WBCs and the volunteer's WBC count is 5.1 WBCs per mm<sup>3</sup> (as measured in the QBC<sup>®</sup> hematology system or Coulter counter) then, the number of asexual parasites per mcl is:

$$\frac{506 \text{ asexual parasites enumerated}}{209 \text{ WBCs enumerated}} \times 5100 \text{ WBCs per mcl} = 12,347 \text{ asexual parasites per mcl}$$

3. If an automated WBC count cannot be made using the QBC<sup>®</sup> hematology system or Coulter counter, a manual WBC count will be performed using a standard Neubauer counting chamber if logistically feasible.

4. If it is not possible to perform a WBC count then an arbitrary count of 8,000 WBCs per mcl will be used.

Version dated May 1998

**Summary:** This SOP is used for cryopreserving and thawing malaria parasites obtained from patients. There is more than one accepted method depending on investigator preferences.

**A. DMSO Method:**

Adapted from Pavanand, et al., 1974 (*J. Parasitol.* 60:537-539).

**1. Materials:**

- 1) Sterile Dulbeccos phosphate buffered saline (PBS)
- 2) Sterile cryopreservation tubes
- 3) Sterile dimethylsulfoxide (DMSO)
- 4) Sterile 15 ml conical centrifuge tubes
- 5) Centrifuge

**2. Preparation of Cryopreservation Fluid:**

- 1) Aseptically add 6.8 ml of Dulbeccos PBS and 1.2 ml of DMSO to a sterile 15 ml conical centrifuge tube.
- 2) Mix the solution thoroughly and store in a refrigerator (if not used immediately).

**3. Method:**

- 1) Aseptically pipette at least 2 ml of heparinized whole blood into a sterile 15 ml conical centrifuge tube.
- 2) Centrifuge at 500 x g for 7 minutes. If your centrifuge is not calibrated, spin at a speed high enough to create a red cell pellet.
- 3) Remove the supernatant and add the PBS-DMSO mixture dropwise. For example, to a 1 ml packed cell volume of red blood cells, add 4 ml of the cryopreservation fluid. See the attached chart to determine the volume of cryopreservation fluid to add for various packed cell volumes.
- 4) The addition of cryopreservation fluid to the red cell pellet is the most critical step of the procedure. It is very important to add the PBS-DMSO mixture slowly and to mix frequently. For example, after adding 2-3 drops of cryopreservation fluid, you should mix the contents gently by tapping the tube with your finger. Then add 2-3 additional drops and repeat the mixing. By slowly adding the cryopreservation fluid, you ensure the least amount of subsequent hemolysis when the contents are thawed.

5) Once all the cryopreservation fluid has been added, then aliquot the mixture into cryovials and immediately place into liquid nitrogen (vapor phase). Do not pipette less than 0.5 or more than 1.8 ml into a single cryovial. If possible, prepare two or more cryovials for each parasite isolation.

6) All cryovials should be labeled appropriately with patient identification (e.g., study and patient number) and date of collection. Keep all vials frozen in liquid nitrogen until ready for use.

**Chart to Determine Volume of Cryopreservation Fluid to Add to Packed Red Blood Cells**

| Packed Cell Volume | Cryopreservation Fluid |              |
|--------------------|------------------------|--------------|
|                    | Volume to Add          | Final Volume |
| 0.1 ml             | 0.4 ml                 | 0.5 ml       |
| 0.2 ml             | 0.8 ml                 | 1.0 ml       |
| 0.3 ml             | 1.2 ml                 | 1.5 ml       |
| 0.4 ml             | 1.6 ml                 | 2.0 ml       |
| 0.5 ml             | 2.0 ml                 | 2.5 ml       |
| 0.6 ml             | 2.4 ml                 | 3.0 ml       |
| 0.7 ml             | 2.8 ml                 | 3.5 ml       |
| 0.8 ml             | 3.2 ml                 | 4.0 ml       |
| 0.9 ml             | 3.6 ml                 | 4.5 ml       |
| 1.0 ml             | 4.0 ml                 | 5.0 ml       |



**B. ACD Method of Cryopreservation:**

1. Collect blood using acid citrate dextrose (ACD) solution 1:9
2. Centrifuge at 350 G for 5 minutes
3. Aspirate supernatant
4. Slowly add 1/3 volume of Glycerolyte 57 while swirling
5. Let stand for 5 minutes
6. Slowly add 4/3 volumes of Glycerolyte 57 with swirling
7. Aliquot into cryovials (ca. 0.1 - 0.5 ml)
8. Freeze at -80 degrees C overnight
9. Transfer to liquid nitrogen long term storage

EXAMPLE:     volume of packed rbc's = 0.9 ml  
                  1/3 volume = 0.3 ml  
                  4/3 volume = 1.2 ml

**C. Thawing of malaria-infected rbc's**

1. Thaw quickly in 37 degree water bath without shaking
2. Add 0.1 ml of 12% NaCl slowly with gentle swirling
3. Let stand at room temp for 2 minutes
4. Add 10 ml of 1.6% NaCl slowly with swirling
5. Let stand at room temp for 5 minutes
6. Centrifuge at ca. 350 G for 5 minutes
7. Aspirate supernatant; add 10 ml 0.9% NaCl/ 0.2% dextrose slowly with swirling
8. Let stand at room temp for 5 minutes
9. Centrifuge at ca. 350 G for 5 minutes
10. Aspirate supernatant; add media/cells as desired

**Attachment 17: Doses for Infants and Children of anti-malarial drugs according to body weight, expressed as fractions of tablets**

**WRAIR Protocol No. 719, CQ/PS resistance in the Amazon** page 1 of 1

| WEIGHT<br>(kg) | CHLOROQUINE      |       |       | CHLOROQUINE      |       |       | SULFONAMIDE/<br>PYRIMETHAMINE |       |
|----------------|------------------|-------|-------|------------------|-------|-------|-------------------------------|-------|
|                | Tablets 100 mg * |       |       | Tablets 150 mg * |       |       | Tablet 500 mg S<br>+ 25 mg P  |       |
|                | Day 0            | Day 1 | Day 2 | Day 0            | Day 1 | Day 2 | Day 0                         | Day 1 |
| 5              | 1/2              | 1/2   | 1/4   | 1/2              | 1/4   | 1/4   | 1/4                           |       |
| 6              | 1/2              | 1/2   | 1/2   | 1/2              | 1/4   | 1/4   | 1/4                           |       |
| 7              | 3/4              | 1/2   | 1/2   | 1/2              | 1/2   | 1/4   | 1/2                           |       |
| 8              | 3/4              | 3/4   | 1/2   | 1/2              | 1/2   | 1/2   | 1/2                           |       |
| 9              | 1                | 3/4   | 1/2   | 1/2              | 1/2   | 1/2   | 1/2                           |       |
| 10             | 1                | 1     | 1/2   | 3/4              | 1/2   | 1/2   | 1/2                           |       |
| 11             | 1                | 1     | 3/4   | 3/4              | 3/4   | 1/2   | 1/2                           |       |
| 12             | 1                | 1     | 1     | 3/4              | 3/4   | 1/2   | 3/4                           |       |
| 13             | 1 1/4            | 1     | 1     | 1                | 3/4   | 1/2   | 3/4                           |       |
| 14             | 1 1/4            | 1 1/4 | 1     | 1                | 1     | 1/2   | 3/4                           |       |
| 15             | 1 1/2            | 1 1/4 | 1     | 1                | 1     | 1/2   | 3/4                           |       |
| 16             | 1 1/2            | 1 1/2 | 1     | 1                | 1     | 3/4   | 3/4                           |       |
| 17             | 1 3/4            | 1 1/2 | 1     | 1                | 1     | 1     | 3/4                           |       |
| 18             | 1 3/4            | 1 3/4 | 1     | 1                | 1     | 1     | 1                             |       |
| 19             | 2                | 1 3/4 | 1     | 1 1/4            | 1     | 1     | 1                             |       |
| 20             | 2                | 2     | 1     | 1 1/4            | 1 1/4 | 1     | 1                             |       |
| 21             | 2                | 2     | 1 1/4 | 1 1/4            | 1 1/4 | 1     | 1                             |       |
| 22             | 2 1/4            | 2 1/4 | 1     | 1 1/2            | 1 1/2 | 3/4   | 1                             |       |
| 23             | 2 1/2            | 2     | 1 1/4 | 1 1/2            | 1 1/2 | 1     | 1 1/4                         |       |
| 24             | 2 1/2            | 2 1/2 | 1     | 1 1/2            | 1 1/2 | 1     | 1 1/4                         |       |
| 25             | 2 1/2            | 2 1/2 | 1 1/4 | 1 1/2            | 1 1/2 | 1 1/4 | 1 1/4                         |       |

\* expressed as base

Attachment 18: Tables for calculating the minimal sample size according to the two stage lot quality assurance method with confidence level of 95% and power of 80%.

$P_0 = 0.10$

| $P_a =$ | $n_1 + n_2$ | $d_2$ | $n_1$ | $d_1$ |
|---------|-------------|-------|-------|-------|
| 0.020   | 59          | 2     | 49    | 0     |
| 0.030   | 83          | 3     | 49    | 0     |
| 0.040   | 121         | 6     | 49    | 0     |
| 0.050   | 184         | 11    | 49    | 0     |
| 0.060   | 301         | 21    | 75    | 1     |
| 0.070   | 558         | 44    | 140   | 6     |
| 0.080   | 1303        | 112   | 326   | 20    |
| 0.090   | 5395        | 503   | 1349  | 109   |

$P_0 = 0.15$

| $P_a =$ | $n_1 + n_2$ | $d_2$ | $n_1$ | $d_1$ |
|---------|-------------|-------|-------|-------|
| 0.030   | 38          | 2     | 31    | 0     |
| 0.045   | 53          | 3     | 31    | 0     |
| 0.060   | 77          | 6     | 31    | 0     |
| 0.075   | 117         | 11    | 31    | 0     |
| 0.090   | 191         | 20    | 48    | 1     |
| 0.105   | 354         | 42    | 89    | 5     |
| 0.120   | 824         | 106   | 206   | 19    |
| 0.135   | 3404        | 476   | 851   | 103   |

$P_0 = 0.20$

| $P_a =$ | $n_1 + n_2$ | $d_2$ | $n_1$ | $d_1$ |
|---------|-------------|-------|-------|-------|
| 0.040   | 27          | 1     | 22    | 0     |
| 0.060   | 38          | 3     | 22    | 0     |
| 0.080   | 55          | 6     | 22    | 0     |
| 0.100   | 83          | 10    | 22    | 0     |
| 0.120   | 136         | 19    | 34    | 1     |
| 0.140   | 251         | 39    | 63    | 5     |
| 0.160   | 585         | 101   | 146   | 18    |
| 0.180   | 2409        | 449   | 602   | 98    |

$P_0 = 0.25$

| $P_a =$ | $n_1+n_2$ | $d_2$ | $n_1$ | $d_1$ |
|---------|-----------|-------|-------|-------|
| 0.050   | 21        | 1     | 16    | 0     |
| 0.075   | 29        | 3     | 16    | 0     |
| 0.100   | 42        | 5     | 16    | 0     |
| 0.125   | 63        | 10    | 16    | 0     |
| 0.150   | 103       | 18    | 26    | 1     |
| 0.175   | 190       | 37    | 48    | 5     |
| 0.200   | 441       | 95    | 110   | 17    |
| 0.225   | 1812      | 422   | 453   | 92    |

$P_0 = 0.3$

| $P_a =$ | $n_1+n_2$ | $d_2$ | $n_1$ | $d_1$ |
|---------|-----------|-------|-------|-------|
| 0.060   | 16        | 1     | 13    | 0     |
| 0.090   | 23        | 3     | 13    | 0     |
| 0.120   | 33        | 5     | 13    | 0     |
| 0.150   | 50        | 9     | 13    | 0     |
| 0.180   | 81        | 17    | 20    | 1     |
| 0.210   | 149       | 35    | 37    | 5     |
| 0.240   | 345       | 89    | 86    | 16    |
| 0.270   | 1413      | 395   | 353   | 86    |

$P_0 = 0.35$

| $P_a =$ | $n_1+n_2$ | $d_2$ | $n_1$ | $d_1$ |
|---------|-----------|-------|-------|-------|
| 0.070   | 13        | 1     | 10    | 0     |
| 0.105   | 19        | 3     | 10    | 0     |
| 0.140   | 27        | 5     | 10    | 0     |
| 0.175   | 40        | 9     | 10    | 0     |
| 0.210   | 65        | 16    | 16    | 1     |
| 0.245   | 120       | 33    | 30    | 4     |
| 0.280   | 276       | 83    | 69    | 15    |
| 0.315   | 1129      | 368   | 282   | 80    |

P0 = 0.40

| Pa =  | n1+n2 | d2  | n1  | d1 |
|-------|-------|-----|-----|----|
| 0.080 | 11    | 1   | 8   | 0  |
| 0.120 | 15    | 2   | 8   | 0  |
| 0.160 | 22    | 5   | 8   | 0  |
| 0.200 | 33    | 8   | 8   | 0  |
| 0.240 | 54    | 15  | 14  | 1  |
| 0.280 | 98    | 31  | 25  | 4  |
| 0.320 | 225   | 77  | 56  | 14 |
| 0.360 | 916   | 342 | 229 | 74 |

P0 = 0.45

| Pa =  | n1+n2 | d2  | n1  | d1 |
|-------|-------|-----|-----|----|
| 0.090 | 9     | 1   | 7   | 0  |
| 0.135 | 13    | 2   | 7   | 0  |
| 0.180 | 18    | 4   | 7   | 0  |
| 0.225 | 28    | 8   | 7   | 0  |
| 0.270 | 44    | 14  | 11  | 1  |
| 0.315 | 81    | 29  | 20  | 4  |
| 0.360 | 185   | 72  | 46  | 13 |
| 0.405 | 750   | 315 | 188 | 69 |
